# Supplementary material for: Unrecognised actionability for breast cancer risk variants identified in a national-level review of Australian familial cancer centres
Source: Eur J Hum Genet. 2024 Oct 14;32(12):1632–9. doi: 10.1038/s41431-024-01705-9 (PMC11607406; doi:10.1038/s41431-024-01705-9)
Supplement: Supplementary file 2 — Suggested clinically-relevant classifications from application of gene-specific ACMG/AMP criteria and points system (a-e) [file 41431_2024_1705_MOESM2_ESM.xlsx]

## Sheet: BRCA1
Supplementary Table 1a. Suggested clinically-relevant classifications from application of BRCA1-specific ACMG/AMP criteria v1.1.0 and points system for variants with single or multiple conflicting submissions, Uncertain, or absent in ClinVar (as at 1 September 2022), with details on updated ClinVar classification (as at 27 January 2024)*
HGVSc	HGVSp	PVS1	PVS1	Population data (BA1, BS1, PM2)	Functional data (PS3, BS3)	In silico predictions (PP3, BP4)	Clinical data (PP4, BP5)	BP7	BP7_Strong (RNA)	BP1	PM5_PTC	Total points	Our suggested classification	Updated ClinVar review status (as at 27 Jan 2024)	Updated ClinVar classification (as at 27 Jan 2024)	Updated ClinVar conflicting submissions (as at 27 Jan 2024)
NM_007294.4:c.5585A>T	NP_009225.1:p.His1862Leu				-4		-2			-4		-10	Benign	criteria_provided,_conflicting_classifications	Conflicting_classifications_of_pathogenicity	Uncertain_significance(1)|Benign(1)|Likely_benign(2)
NM_007294.4:c.5365G>A	NP_009225.1:p.Ala1789Thr				4	1	1					6	Likely pathogenic	criteria_provided,_conflicting_classifications	Conflicting_classifications_of_pathogenicity	Likely_pathogenic(2)|Uncertain_significance(3)
NM_007294.4:c.5215G>A	NP_009225.1:p.Asp1739Asn			1	-4	-1						-4	Likely benign	criteria_provided,_conflicting_classifications	Conflicting_classifications_of_pathogenicity	Likely_pathogenic(1)|Likely_benign(1)
NM_007294.4:c.4096+3A>G	-			1		1	-8					-6	Likely benign	reviewed_by_expert_panel	Uncertain_significance	-
NM_007294.4:c.4021G>A	NP_009225.1:p.Val1341Ile									-4		-4	Likely benign	criteria_provided,_conflicting_classifications	Conflicting_classifications_of_pathogenicity	Uncertain_significance(3)|Likely_benign(1)
NM_007294.4:c.3160G>A	NP_009225.1:p.Val1054Met									-4		-4	Likely benign	criteria_provided,_conflicting_classifications	Conflicting_classifications_of_pathogenicity	Uncertain_significance(3)|Likely_benign(1)
NM_007294.4:c.3143G>A	NP_009225.1:p.Gly1048Asp			-4			-8		-4	-4		-20	Benign	criteria_provided,_conflicting_classifications	Conflicting_classifications_of_pathogenicity	Uncertain_significance(6)|Likely_benign(4)
NM_007294.4:c.2381C>T	NP_009225.1:p.Ala794Val			1						-4		-3	Likely benign	criteria_provided,_conflicting_classifications	Conflicting_classifications_of_pathogenicity	Uncertain_significance(2)|Likely_benign(1)
NM_007294.4:c.68A>C	NP_009225.1:p.Glu23Ala			1	-4	-1						-4	Likely benign	criteria_provided,_multiple_submitters,_no_conflicts	Uncertain_significance	-
NM_007294.4:c.3328_3330delAAG	NP_009225.1:p.Lys1110del			-8	-4		-4			-4		-20	Benign	criteria_provided,_conflicting_classifications	Conflicting_classifications_of_pathogenicity	Uncertain_significance(6)|Benign(2)|Likely_benign(7)
NM_007294.4:c.2885A>G	NP_009225.1:p.Glu962Gly									-4		-4	Likely benign	criteria_provided,_conflicting_classifications	Conflicting_classifications_of_pathogenicity	Uncertain_significance(3)|Likely_benign(1)
NM_007294.4:c.1759A>G	NP_009225.1:p.Ile587Val			1						-4		-3	Likely benign	criteria_provided,_conflicting_classifications	Conflicting_classifications_of_pathogenicity	Uncertain_significance(3)|Likely_benign(1)
NM_007294.4:c.1384G>A	NP_009225.1:p.Gly462Arg						-8		-4	-4		-16	Benign	criteria_provided,_conflicting_classifications	Conflicting_classifications_of_pathogenicity	Uncertain_significance(7)|Likely_benign(1)
NM_007294.4:c.893A>G	NP_009225.1:p.Asn298Ser									-4		-4	Likely benign	-	-	-
NM_007294.4:c.5277+48_5277+59dupGTATTCCACTCC	-					-1	-8	-1				-10	Benign	-	-	-
NM_007294.4:c.5269G>C	NP_009225.1:p.Asp1757His			1	-4	-1						-4	Likely benign	criteria_provided,_conflicting_classifications	Conflicting_classifications_of_pathogenicity	Uncertain_significance(2)|Likely_benign(1)
NM_007294.4:c.5152+15A>G	-					-1	-4	-1				-6	Likely benign	criteria_provided,_conflicting_classifications	Conflicting_classifications_of_pathogenicity	Uncertain_significance(1)|Likely_benign(4)
NM_007294.4:c.5074+314G>A	-			-8		-1		-1				-10	Benign	-	-	-
NM_007294.4:c.5074+240G>A	-					-1		-1				-2	Likely benign	-	-	-
NM_007294.4:c.5074+208C>T	-					-1		-1				-2	Likely benign	-	-	-
NM_007294.4:c.5074+70C>T	-			-1		-1		-1				-3	Likely benign	-	-	-
NM_007294.4:c.4675+241G>A	-			-1		-1		-1				-3	Likely benign	-	-	-
NM_007294.4:c.4185+55G>A	-			1		-1		-1				-1	Likely benign	-	-	-
NM_007294.4:c.4185+37_4185+38del	-			-1		-1			-4			-6	Likely benign	criteria_provided,_conflicting_classifications	Conflicting_classifications_of_pathogenicity	Uncertain_significance(1)|Likely_benign(2)
NM_007294.4:c.4097-44T>C	-			1		-1		-1				-1	Likely benign	-	-	-
NM_007294.4:c.3869A>C	NP_009225.1:p.Lys1290Thr									-4		-4	Likely benign	criteria_provided,_conflicting_classifications	Conflicting_classifications_of_pathogenicity	Uncertain_significance(2)|Likely_benign(1)
NM_007294.4:c.3769G>A	NP_009225.1:p.Glu1257Lys			1						-4		-3	Likely benign	criteria_provided,_conflicting_classifications	Conflicting_classifications_of_pathogenicity	Uncertain_significance(1)|Likely_benign(1)
NM_007294.4:c.3713C>G	NP_009225.1:p.Pro1238Arg									-4		-4	Likely benign	criteria_provided,_conflicting_classifications	Conflicting_classifications_of_pathogenicity	Uncertain_significance(3)|Likely_benign(1)
NM_007294.4:c.2662C>T	NP_009225.1:p.His888Tyr				-4		-8			-4		-16	Benign	criteria_provided,_conflicting_classifications	Conflicting_classifications_of_pathogenicity	Uncertain_significance(9)|Benign(2)|Likely_benign(2)
NM_007294.4:c.2623C>T	NP_009225.1:p.Pro875Ser			1						-4		-3	Likely benign	criteria_provided,_conflicting_classifications	Conflicting_classifications_of_pathogenicity	Uncertain_significance(1)|Likely_benign(1)
NM_007294.4:c.2368A>G	NP_009225.1:p.Thr790Ala			-4			-1			-4		-9	Benign	criteria_provided,_conflicting_classifications	Conflicting_classifications_of_pathogenicity	Uncertain_significance(3)|Benign(4)|Likely_benign(4)
NM_007294.4:c.1837A>G	NP_009225.1:p.Arg613Gly			1						-4		-3	Likely benign	criteria_provided,_conflicting_classifications	Conflicting_classifications_of_pathogenicity	Uncertain_significance(6)|Likely_benign(2)
NM_007294.4:c.1573G>A	NP_009225.1:p.Val525Ile			-1						-4		-5	Likely benign	criteria_provided,_conflicting_classifications	Conflicting_classifications_of_pathogenicity	Uncertain_significance(3)|Likely_benign(5)
NM_007294.4:c.1510C>T	NP_009225.1:p.Arg504Cys						-2			-4		-6	Likely benign	criteria_provided,_conflicting_classifications	Conflicting_classifications_of_pathogenicity	Uncertain_significance(7)|Likely_benign(1)
NM_007294.4:c.1423A>T	NP_009225.1:p.Ser475Cys									-4		-4	Likely benign	criteria_provided,_conflicting_classifications	Conflicting_classifications_of_pathogenicity	Uncertain_significance(2)|Likely_benign(2)
NM_007294.4:c.1202G>C	NP_009225.1:p.Gly401Ala			1						-4		-3	Likely benign	criteria_provided,_conflicting_classifications	Conflicting_classifications_of_pathogenicity	Uncertain_significance(6)|Likely_benign(1)
NM_007294.4:c.547+68A>G	-			-1		-1		-1				-3	Likely benign	-	-	-
NM_007294.4:c.465A>T	NP_009225.1:p.Gln155His									-4		-4	Likely benign	criteria_provided,_multiple_submitters,_no_conflicts	Uncertain_significance	-
NM_007294.4:c.4636G>C	NP_009225.1:p.Asp1546His			-1						-4		-5	Likely benign	criteria_provided,_multiple_submitters,_no_conflicts	Uncertain_significance	-
NM_007294.4:c.4131C>A	NP_009225.1:p.Ser1377Arg									-4		-4	Likely benign	criteria_provided,_multiple_submitters,_no_conflicts	Uncertain_significance	-
NM_007294.4:c.4045A>C	NP_009225.1:p.Thr1349Pro									-4		-4	Likely benign	criteria_provided,_conflicting_classifications	Conflicting_classifications_of_pathogenicity	Uncertain_significance(2)|Likely_benign(1)
NM_007294.4:c.3711A>G	NP_009225.1:p.Ile1237Met				-4					-4		-8	Benign	criteria_provided,_conflicting_classifications	Conflicting_classifications_of_pathogenicity	Uncertain_significance(7)|Likely_benign(4)
NM_007294.4:c.799T>C	NP_009225.1:p.Ser267Pro									-4		-4	Likely benign	criteria_provided,_conflicting_classifications	Conflicting_classifications_of_pathogenicity	Uncertain_significance(4)|Benign(1)|Likely_benign(1)
NM_007294.4:c.509G>A	NP_009225.1:p.Arg170Gln			-1	-4		2		-4	-4		-11	Benign	criteria_provided,_conflicting_classifications	Conflicting_classifications_of_pathogenicity	Uncertain_significance(5)|Likely_benign(4)
NM_007294.4:c.5357T>C	NP_009225.1:p.Leu1786Pro			1	4	1	8					14	Pathogenic	criteria_provided,_conflicting_classifications	Conflicting_classifications_of_pathogenicity	Likely_pathogenic(7)|Uncertain_significance(2)
NM_007294.4:c.4669G>C	NP_009225.1:p.Asp1557His			-4	-4					-4		-12	Benign	criteria_provided,_conflicting_classifications	Conflicting_classifications_of_pathogenicity	Uncertain_significance(4)|Likely_benign(2)
NM_007294.4:c.4358-2725T>C	-			-4		-1		-1				-6	Likely benign	criteria_provided,_conflicting_classifications	Conflicting_classifications_of_pathogenicity	Uncertain_significance(1)|Likely_benign(1)
NM_007294.4:c.3596C>T	NP_009225.1:p.Ala1199Val			-4	-4		-2			-4		-14	Benign	criteria_provided,_conflicting_classifications	Conflicting_classifications_of_pathogenicity	Uncertain_significance(1)|Likely_benign(6)
NM_007294.4:c.3173T>C	NP_009225.1:p.Ile1058Thr			1						-4		-3	Likely benign	-	-	-
NM_007294.4:c.2759T>C	NP_009225.1:p.Val920Ala						-8			-4		-12	Benign	criteria_provided,_conflicting_classifications	Conflicting_classifications_of_pathogenicity	Uncertain_significance(1)|Likely_benign(1)
NM_007294.4:c.2447A>G	NP_009225.1:p.His816Arg						-2			-4		-6	Likely benign	criteria_provided,_conflicting_classifications	Conflicting_classifications_of_pathogenicity	Uncertain_significance(5)|Benign(2)|Likely_benign(6)
NM_007294.4:c.2268G>C	NP_009225.1:p.Arg756Ser						-4			-4		-8	Benign	criteria_provided,_conflicting_classifications	Conflicting_classifications_of_pathogenicity	Uncertain_significance(6)|Likely_benign(3)
NM_007294.4:c.2259T>G	NP_009225.1:p.Ser753Arg			1						-4		-3	Likely benign	criteria_provided,_conflicting_classifications	Conflicting_classifications_of_pathogenicity	Uncertain_significance(2)|Likely_benign(1)
NM_007294.4:c.1881C>G	NP_009225.1:p.Val627=			-1			-1			-4		-6	Likely benign	criteria_provided,_conflicting_classifications	Conflicting_classifications_of_pathogenicity	Uncertain_significance(11)|Likely_benign(2)
NM_007294.4:c.1709C>A	NP_009225.1:p.Pro570Gln									-4		-4	Likely benign	criteria_provided,_conflicting_classifications	Conflicting_classifications_of_pathogenicity	Uncertain_significance(6)|Likely_benign(1)
NM_007294.4:c.1604G>T	NP_009225.1:p.Gly535Val			1						-4		-3	Likely benign	-	-	-
NM_007294.4:c.121C>A	NP_009225.1:p.His41Asn			1	4	1						6	Likely pathogenic	criteria_provided,_conflicting_classifications	Conflicting_classifications_of_pathogenicity	Pathogenic(1)|Likely_pathogenic(1)|Uncertain_significance(1)
NM_007294.4:c.-19-32_-19-31dup	-					-1		-1				-2	Likely benign	-	-	-
NM_007294.4:c.4882A>G	NP_009225.1:p.Met1628Val			-1	-4		-8		-4	-4		-21	Benign	criteria_provided,_conflicting_classifications	Conflicting_classifications_of_pathogenicity	Uncertain_significance(2)|Benign(2)|Likely_benign(8)
NM_007294.4:c.3448C>A	NP_009225.1:p.Pro1150Thr			1						-4		-3	Likely benign	criteria_provided,_conflicting_classifications	Conflicting_classifications_of_pathogenicity	Uncertain_significance(1)|Likely_benign(1)
NM_007294.4:c.3267G>C	NP_009225.1:p.Leu1089Phe			1						-4		-3	Likely benign	-	-	-
NM_007294.4:c.3267G>T	NP_009225.1:p.Leu1089Phe						-1			-4		-5	Likely benign	criteria_provided,_conflicting_classifications	Conflicting_classifications_of_pathogenicity	Uncertain_significance(5)|Likely_benign(2)
NM_007294.4:c.3101A>C	NP_009225.1:p.Asn1034Thr			1						-4		-3	Likely benign	criteria_provided,_conflicting_classifications	Conflicting_classifications_of_pathogenicity	Uncertain_significance(1)|Likely_benign(1)
NM_007294.4:c.1766G>T	NP_009225.1:p.Ser589Ile						1			-4		-3	Likely benign	criteria_provided,_conflicting_classifications	Conflicting_classifications_of_pathogenicity	Uncertain_significance(5)|Likely_benign(1)
NM_007294.4:c.560+51delT	-					-1		-1				-2	Likely benign	-	-	-
NM_007294.4:c.198T>A	NP_009225.1:p.Asn66Lys			1	-4	-1						-4	Likely benign	criteria_provided,_single_submitter	Uncertain_significance	-
NM_007294.4:c.5571_5579del	NP_009225.1:p.Gln1857_Pro1859del			-4		-1						-5	Likely benign	criteria_provided,_conflicting_classifications	Conflicting_classifications_of_pathogenicity	Uncertain_significance(3)|Likely_benign(1)
NM_007294.4:c.5555C>T	NP_009225.1:p.Thr1852Ile			1	-4	-1						-4	Likely benign	criteria_provided,_conflicting_classifications	Conflicting_classifications_of_pathogenicity	Uncertain_significance(3)|Likely_benign(1)
NM_007294.4:c.4942A>G	NP_009225.1:p.Lys1648Glu				-4					-4		-8	Benign	criteria_provided,_multiple_submitters,_no_conflicts	Uncertain_significance	-
NM_007294.4:c.4485-8C>T	-					-1	-1					-2	Likely benign	criteria_provided,_conflicting_classifications	Conflicting_classifications_of_pathogenicity	Uncertain_significance(3)|Benign(1)|Likely_benign(2)
NM_007294.4:c.4354A>G	NP_009225.1:p.Lys1452Glu			1						-4		-3	Likely benign	criteria_provided,_single_submitter	Uncertain_significance	-
NM_007294.4:c.3712C>T	NP_009225.1:p.Pro1238Ser			1						-4		-3	Likely benign	criteria_provided,_conflicting_classifications	Conflicting_classifications_of_pathogenicity	Uncertain_significance(2)|Likely_benign(2)
NM_007294.4:c.3515A>G	NP_009225.1:p.Glu1172Gly						1			-4		-3	Likely benign	criteria_provided,_conflicting_classifications	Conflicting_classifications_of_pathogenicity	Uncertain_significance(3)|Likely_benign(2)
NM_007294.4:c.3379T>C	NP_009225.1:p.Tyr1127His									-4		-4	Likely benign	criteria_provided,_conflicting_classifications	Conflicting_classifications_of_pathogenicity	Uncertain_significance(5)|Likely_benign(1)
NM_007294.4:c.3355A>T	NP_009225.1:p.Thr1119Ser						-1			-4		-5	Likely benign	criteria_provided,_conflicting_classifications	Conflicting_classifications_of_pathogenicity	Uncertain_significance(4)|Likely_benign(2)
NM_007294.4:c.2980T>C	NP_009225.1:p.Cys994Arg									-4		-4	Likely benign	criteria_provided,_conflicting_classifications	Conflicting_classifications_of_pathogenicity	Uncertain_significance(4)|Likely_benign(1)
NM_007294.4:c.2773A>G	NP_009225.1:p.Ile925Val									-4		-4	Likely benign	criteria_provided,_conflicting_classifications	Conflicting_classifications_of_pathogenicity	Uncertain_significance(4)|Likely_benign(4)
NM_007294.4:c.2726A>T	NP_009225.1:p.Asn909Ile			-4			-2			-4		-10	Benign	criteria_provided,_conflicting_classifications	Conflicting_classifications_of_pathogenicity	Uncertain_significance(7)|Benign(1)|Likely_benign(4)
NM_007294.4:c.2346T>A	NP_009225.1:p.Ser782Arg			1			-1			-4		-4	Likely benign	criteria_provided,_conflicting_classifications	Conflicting_classifications_of_pathogenicity	Uncertain_significance(3)|Likely_benign(2)
NM_007294.4:c.1955A>G	NP_009225.1:p.Lys652Arg			1						-4		-3	Likely benign	-	-	-
NM_007294.4:c.1928G>T	NP_009225.1:p.Ser643Ile			1						-4		-3	Likely benign	criteria_provided,_conflicting_classifications	Conflicting_classifications_of_pathogenicity	Uncertain_significance(2)|Likely_benign(1)
NM_007294.4:c.1502A>C	NP_009225.1:p.Lys501Thr			1						-4		-3	Likely benign	criteria_provided,_conflicting_classifications	Conflicting_classifications_of_pathogenicity	Uncertain_significance(3)|Likely_benign(1)
NM_007294.4:c.862A>G	NP_009225.1:p.Ser288Gly			1						-4		-3	Likely benign	criteria_provided,_conflicting_classifications	Conflicting_classifications_of_pathogenicity	Uncertain_significance(1)|Likely_benign(1)
NM_007294.4:c.701C>A	NP_009225.1:p.Thr234Lys									-4		-4	Likely benign	criteria_provided,_conflicting_classifications	Conflicting_classifications_of_pathogenicity	Uncertain_significance(5)|Likely_benign(1)
NM_007294.4:c.692C>T	NP_009225.1:p.Thr231Met			-1	-4		-8		-4	-4		-21	Benign	criteria_provided,_conflicting_classifications	Conflicting_classifications_of_pathogenicity	Uncertain_significance(6)|Likely_benign(4)
NM_007294.4:c.302-124delG	-			-1		-1		-1				-3	Likely benign	-	-	-
NM_007294.4:c.134A>C	NP_009225.1:p.Lys45Thr					-1	-4					-5	Likely benign	criteria_provided,_conflicting_classifications	Conflicting_classifications_of_pathogenicity	Uncertain_significance(4)|Likely_benign(3)
NM_007294.4:c.81-6T>C	-			-1	-4	-1	-2		-4			-12	Benign	criteria_provided,_conflicting_classifications	Conflicting_classifications_of_pathogenicity	Uncertain_significance(4)|Benign(3)|Likely_benign(2)
NM_007294.4:c.1259A>G	NP_009225.1:p.Asp420Gly									-4		-4	Likely benign	criteria_provided,_conflicting_classifications	Conflicting_classifications_of_pathogenicity	Uncertain_significance(8)|Benign(1)|Likely_benign(1)
NM_007294.4:c.3845A>T	NP_009225.1:p.Glu1282Val				-4				-4	-4		-12	Benign	criteria_provided,_conflicting_classifications	Conflicting_classifications_of_pathogenicity	Uncertain_significance(5)|Likely_benign(4)
NM_007294.4:c.5306A>G	NP_009225.1:p.Tyr1769Cys			-4		-1	-4					-9	Benign	criteria_provided,_conflicting_classifications	Conflicting_classifications_of_pathogenicity	Uncertain_significance(7)|Likely_benign(4)
NM_007294.4:c.5236C>G	NP_009225.1:p.His1746Asp			1	4	1						6	Likely pathogenic	criteria_provided,_conflicting_classifications	Conflicting_classifications_of_pathogenicity	Likely_pathogenic(2)|Uncertain_significance(2)
NM_007294.4:c.4823C>T	NP_009225.1:p.Ala1608Val			1	-4					-4		-7	Benign	criteria_provided,_single_submitter	Uncertain_significance	-
NM_007294.4:c.4300A>C	NP_009225.1:p.Ser1434Arg			1						-4		-3	Likely benign	-	-	-
NM_007294.4:c.3746C>A	NP_009225.1:p.Thr1249Asn			1						-4		-3	Likely benign	-	-	-
NM_007294.4:c.2935C>T	NP_009225.1:p.Arg979Cys						-8		-4	-4		-16	Benign	criteria_provided,_multiple_submitters,_no_conflicts	Likely_benign	-
NM_007294.4:c.2481A>G	NP_009225.1:p.Glu827=									-4		-4	Likely benign	criteria_provided,_conflicting_classifications	Conflicting_classifications_of_pathogenicity	Uncertain_significance(1)|Likely_benign(4)
NM_007294.4:c.2347A>G	NP_009225.1:p.Ile783Val			-4	-4					-4		-12	Benign	criteria_provided,_conflicting_classifications	Conflicting_classifications_of_pathogenicity	Uncertain_significance(2)|Benign(2)|Likely_benign(4)
NM_007294.4:c.2252T>C	NP_009225.1:p.Met751Thr						-2			-4		-6	Likely benign	criteria_provided,_conflicting_classifications	Conflicting_classifications_of_pathogenicity	Uncertain_significance(3)|Likely_benign(3)
NM_007294.4:c.1984C>T	NP_009225.1:p.His662Tyr			1						-4		-3	Likely benign	criteria_provided,_conflicting_classifications	Conflicting_classifications_of_pathogenicity	Uncertain_significance(3)|Likely_benign(1)
NM_007294.4:c.1769G>A	NP_009225.1:p.Ser590Asn			1						-4		-3	Likely benign	criteria_provided,_conflicting_classifications	Conflicting_classifications_of_pathogenicity	Uncertain_significance(2)|Likely_benign(1)
NM_007294.4:c.1757C>G	NP_009225.1:p.Pro586Arg			1						-4		-3	Likely benign	criteria_provided,_conflicting_classifications	Conflicting_classifications_of_pathogenicity	Uncertain_significance(2)|Likely_benign(1)
NM_007294.4:c.1397G>A	NP_009225.1:p.Arg466Gln			-1	-4					-4		-9	Benign	criteria_provided,_conflicting_classifications	Conflicting_classifications_of_pathogenicity	Uncertain_significance(4)|Benign(1)|Likely_benign(6)
NM_007294.4:c.1291T>A	NP_009225.1:p.Leu431Ile			1						-4		-3	Likely benign	criteria_provided,_conflicting_classifications	Conflicting_classifications_of_pathogenicity	Uncertain_significance(4)|Likely_benign(1)
NM_007294.4:c.995G>A	NP_009225.1:p.Arg332Gln			-1	-4				-4	-4		-13	Benign	criteria_provided,_conflicting_classifications	Conflicting_classifications_of_pathogenicity	Uncertain_significance(6)|Benign(1)|Likely_benign(4)
NM_007294.4:c.953A>G	NP_009225.1:p.His318Arg			-1						-4		-5	Likely benign	criteria_provided,_conflicting_classifications	Conflicting_classifications_of_pathogenicity	Uncertain_significance(5)|Likely_benign(1)
NM_007294.4:c.5347A>C	NP_009225.1:p.Met1783Leu			-4	-4	-1						-9	Benign	criteria_provided,_conflicting_classifications	Conflicting_classifications_of_pathogenicity	Uncertain_significance(5)|Benign(1)|Likely_benign(4)
NM_007294.4:c.5335C>G	NP_009225.1:p.Gln1779Glu				-4	-1						-5	Likely benign	criteria_provided,_multiple_submitters,_no_conflicts	Uncertain_significance	-
NM_007294.4:c.4765C>T	NP_009225.1:p.Arg1589Cys				-4		-2			-4		-10	Benign	criteria_provided,_conflicting_classifications	Conflicting_classifications_of_pathogenicity	Uncertain_significance(3)|Likely_benign(5)
NM_007294.4:c.4358-2789A>G	-			-4		-1		-1				-6	Likely benign	criteria_provided,_single_submitter	Uncertain_significance	-
NM_007294.4:c.4166G>A	NP_009225.1:p.Ser1389Asn			-4			-2			-4		-10	Benign	criteria_provided,_conflicting_classifications	Conflicting_classifications_of_pathogenicity	Uncertain_significance(6)|Benign(1)|Likely_benign(3)
NM_007294.4:c.4103C>T	NP_009225.1:p.Ala1368Val						-2			-4		-6	Likely benign	criteria_provided,_multiple_submitters,_no_conflicts	Uncertain_significance	-
NM_007294.4:c.4097-27T>G	-			1		-1		-1				-1	Likely benign	-	-	-
NM_007294.4:c.3149G>C	NP_009225.1:p.Ser1050Thr			1						-4		-3	Likely benign	criteria_provided,_conflicting_classifications	Conflicting_classifications_of_pathogenicity	Uncertain_significance(2)|Likely_benign(1)
NM_007294.4:c.3070_3071dup	NP_009225.1:p.Ser1024ArgfsTer25	PVS1	8								4	12	Pathogenic	-	-	-
NM_007294.4:c.2158G>A	NP_009225.1:p.Glu720Lys						1			-4		-3	Likely benign	criteria_provided,_conflicting_classifications	Conflicting_classifications_of_pathogenicity	Uncertain_significance(2)|Likely_benign(1)
NM_007294.4:c.2006T>C	NP_009225.1:p.Met669Thr			-4			-4			-4		-12	Benign	criteria_provided,_conflicting_classifications	Conflicting_classifications_of_pathogenicity	Uncertain_significance(2)|Benign(2)|Likely_benign(5)
NM_007294.4:c.1842G>T	NP_009225.1:p.Lys614Asn									-4		-4	Likely benign	criteria_provided,_conflicting_classifications	Conflicting_classifications_of_pathogenicity	Uncertain_significance(6)|Likely_benign(1)
NM_007294.4:c.1520G>A	NP_009225.1:p.Arg507Lys			1						-4		-3	Likely benign	criteria_provided,_conflicting_classifications	Conflicting_classifications_of_pathogenicity	Uncertain_significance(1)|Likely_benign(1)
NM_007294.4:c.742A>G	NP_009225.1:p.Thr248Ala									-4		-4	Likely benign	criteria_provided,_conflicting_classifications	Conflicting_classifications_of_pathogenicity	Uncertain_significance(3)|Likely_benign(1)
NM_007294.4:c.572T>A	NP_009225.1:p.Val191Asp				-4					-4		-8	Benign	criteria_provided,_conflicting_classifications	Conflicting_classifications_of_pathogenicity	Uncertain_significance(2)|Likely_benign(3)
NM_007294.4:c.247G>C	NP_009225.1:p.Val83Leu			1	-4							-3	Likely benign	no_classification_provided	not_provided	-
NM_007294.4:c.11C>T	NP_009225.1:p.Ser4Phe			1	-4	-1						-4	Likely benign	criteria_provided,_multiple_submitters,_no_conflicts	Uncertain_significance	-
NM_007294.4:c.4127C>G	NP_009225.1:p.Thr1376Arg									-4		-4	Likely benign	criteria_provided,_conflicting_classifications	Conflicting_classifications_of_pathogenicity	Uncertain_significance(5)|Likely_benign(2)
NM_007294.4:c.1859T>A	NP_009225.1:p.Ile620Asn			1						-4		-3	Likely benign	criteria_provided,_conflicting_classifications	Conflicting_classifications_of_pathogenicity	Uncertain_significance(2)|Likely_benign(1)
NM_007294.4:c.135-62T>C	-			1		-1		-1				-1	Likely benign	-	-	-
NM_007294.4:c.5018A>G	NP_009225.1:p.His1673Arg			1	-4							-3	Likely benign	criteria_provided,_conflicting_classifications	Conflicting_classifications_of_pathogenicity	Uncertain_significance(2)|Likely_benign(2)
NM_007294.4:c.4993G>A	NP_009225.1:p.Val1665Met				-4		-8					-12	Benign	criteria_provided,_conflicting_classifications	Conflicting_classifications_of_pathogenicity	Uncertain_significance(2)|Likely_benign(6)
NM_007294.4:c.4779A>G	NP_009225.1:p.Ile1593Met			1						-4		-3	Likely benign	-	-	-
NM_007294.4:c.4006A>T	NP_009225.1:p.Ser1336Cys						-1			-4		-5	Likely benign	criteria_provided,_conflicting_classifications	Conflicting_classifications_of_pathogenicity	Uncertain_significance(1)|Likely_benign(4)
NM_007294.4:c.3560G>A	NP_009225.1:p.Ser1187Asn			-1			-1			-4		-6	Likely benign	criteria_provided,_conflicting_classifications	Conflicting_classifications_of_pathogenicity	Uncertain_significance(5)|Likely_benign(2)
NM_007294.4:c.3526G>A	NP_009225.1:p.Val1176Ile									-4		-4	Likely benign	criteria_provided,_conflicting_classifications	Conflicting_classifications_of_pathogenicity	Uncertain_significance(2)|Likely_benign(1)
NM_007294.4:c.3497C>T	NP_009225.1:p.Ala1166Val			1						-4		-3	Likely benign	-	-	-
NM_007294.4:c.3358G>A	NP_009225.1:p.Val1120Ile									-4		-4	Likely benign	criteria_provided,_conflicting_classifications	Conflicting_classifications_of_pathogenicity	Uncertain_significance(6)|Likely_benign(1)
NM_007294.4:c.3327_3329del	NP_009225.1:p.Lys1110del						-4		-4	-4		-12	Benign	criteria_provided,_conflicting_classifications	Conflicting_classifications_of_pathogenicity	Uncertain_significance(8)|Likely_benign(3)
NM_007294.4:c.3270A>T	NP_009225.1:p.Gln1090His						-2			-4		-6	Likely benign	criteria_provided,_conflicting_classifications	Conflicting_classifications_of_pathogenicity	Uncertain_significance(4)|Likely_benign(2)
NM_007294.4:c.2933A>G	NP_009225.1:p.Tyr978Cys									-4		-4	Likely benign	criteria_provided,_conflicting_classifications	Conflicting_classifications_of_pathogenicity	Uncertain_significance(5)|Likely_benign(1)
NM_007294.4:c.2330A>T	NP_009225.1:p.Tyr777Phe			1						-4		-3	Likely benign	criteria_provided,_conflicting_classifications	Conflicting_classifications_of_pathogenicity	Uncertain_significance(1)|Likely_benign(1)
NM_007294.4:c.2050C>T	NP_009225.1:p.Pro684Ser						-4			-4		-8	Benign	criteria_provided,_conflicting_classifications	Conflicting_classifications_of_pathogenicity	Uncertain_significance(8)|Likely_benign(2)
NM_007294.4:c.1897C>T	NP_009225.1:p.Pro633Ser				-4					-4		-8	Benign	criteria_provided,_conflicting_classifications	Conflicting_classifications_of_pathogenicity	Uncertain_significance(6)|Likely_benign(2)
NM_007294.4:c.1763_1764delinsAA	NP_009225.1:p.Ser588Lys			1						-4		-3	Likely benign	criteria_provided,_conflicting_classifications	Conflicting_classifications_of_pathogenicity	Uncertain_significance(3)|Likely_benign(1)
NM_007294.4:c.1616C>A	NP_009225.1:p.Thr539Lys									-4		-4	Likely benign	criteria_provided,_conflicting_classifications	Conflicting_classifications_of_pathogenicity	Uncertain_significance(3)|Likely_benign(2)
NM_007294.4:c.1285A>G	NP_009225.1:p.Ile429Val			1						-4		-3	Likely benign	-	-	-
NM_007294.4:c.1096G>C	NP_009225.1:p.Asp366His			1	-4					-4		-7	Benign	criteria_provided,_conflicting_classifications	Conflicting_classifications_of_pathogenicity	Uncertain_significance(4)|Likely_benign(1)
NM_007294.4:c.811G>A	NP_009225.1:p.Val271Met			-4	-4					-4		-12	Benign	criteria_provided,_conflicting_classifications	Conflicting_classifications_of_pathogenicity	Likely_pathogenic(1)|Uncertain_significance(1)|Benign(6)|Likely_benign(9)
NM_007294.4:c.671-8A>G	-			-4		-1						-5	Likely benign	criteria_provided,_conflicting_classifications	Conflicting_classifications_of_pathogenicity	Uncertain_significance(3)|Benign(5)|Likely_benign(1)
NM_007294.4:c.4675+245G>A	-			-8		-1		-1				-10	Benign	criteria_provided,_single_submitter	Likely_benign	-
NM_007294.4:c.4186-128A>T	-			-4		-1		-1				-6	Likely benign	criteria_provided,_single_submitter	Likely_benign	-
*Please check ClinVar for the most up-to-date classification

## Sheet: BRCA2
Supplementary Table 1b. Suggested clinically-relevant classifications from application of BRCA2-specific ACMG/AMP criteria v1.1.0 and points system for variants with single or multiple conflicting submissions, Uncertain, or absent in ClinVar (as at 1 September 2022), with details on updated ClinVar classification (as at 27 January 2024)*
HGVSc	HGVSp	PVS1	PVS1	Population data (BA1, BS1, PM2)	Functional data (PS3, BS3)	In silico predictions (PP3, BP4)	Clinical data (PP4, BP5)	BP7	BP7_Strong (RNA)	BP1	PM5_PTC	Total points	Our suggested classification	Caveats	Updated ClinVar review status (as at 27 Jan 2024)	Updated ClinVar classification (as at 27 Jan 2024)	Updated ClinVar conflicting submissions (as at 27 Jan 2024)
NM_000059.4:c.215A>G	NP_000050.3:p.Asn72Ser			-4			-4		-4	-4		-16	Benign		criteria_provided,_conflicting_classifications	Conflicting_classifications_of_pathogenicity	Uncertain_significance(4)|Benign(1)|Likely_benign(3)
NM_000059.4:c.455C>A	NP_000050.3:p.Thr152Lys			1			1			-4		-2	Likely benign		criteria_provided,_conflicting_classifications	Conflicting_classifications_of_pathogenicity	Uncertain_significance(5)|Likely_benign(1)
NM_000059.4:c.1315T>G	NP_000050.3:p.Phe439Val									-4		-4	Likely benign		criteria_provided,_conflicting_classifications	Conflicting_classifications_of_pathogenicity	Uncertain_significance(6)|Likely_benign(1)
NM_000059.4:c.1483G>A	NP_000050.3:p.Ala495Thr			1						-4		-3	Likely benign		criteria_provided,_conflicting_classifications	Conflicting_classifications_of_pathogenicity	Uncertain_significance(7)|Likely_benign(1)
NM_000059.4:c.1505A>G	NP_000050.3:p.Lys502Arg			1						-4		-3	Likely benign		criteria_provided,_conflicting_classifications	Conflicting_classifications_of_pathogenicity	Uncertain_significance(2)|Likely_benign(1)
NM_000059.4:c.1742C>T	NP_000050.3:p.Ser581Phe									-4		-4	Likely benign		criteria_provided,_conflicting_classifications	Conflicting_classifications_of_pathogenicity	Uncertain_significance(3)|Likely_benign(1)
NM_000059.4:c.1762A>G	NP_000050.3:p.Asn588Asp				-4		-1			-4		-9	Benign		criteria_provided,_conflicting_classifications	Conflicting_classifications_of_pathogenicity	Uncertain_significance(3)|Likely_benign(9)
NM_000059.4:c.1793C>T	NP_000050.3:p.Thr598Ile			-1	-4					-4		-9	Benign		criteria_provided,_conflicting_classifications	Conflicting_classifications_of_pathogenicity	Uncertain_significance(7)|Likely_benign(1)
NM_000059.4:c.2229T>G	NP_000050.3:p.His743Gln			1						-4		-3	Likely benign		-	-	-
NM_000059.4:c.2353A>G	NP_000050.3:p.Ile785Val									-4		-4	Likely benign		criteria_provided,_conflicting_classifications	Conflicting_classifications_of_pathogenicity	Uncertain_significance(5)|Likely_benign(1)
NM_000059.4:c.2971A>C	NP_000050.3:p.Asn991His			1						-4		-3	Likely benign		-	-	-
NM_000059.4:c.3199A>G	NP_000050.3:p.Thr1067Ala			1						-4		-3	Likely benign		criteria_provided,_conflicting_classifications	Conflicting_classifications_of_pathogenicity	Uncertain_significance(2)|Likely_benign(1)
NM_000059.4:c.3431T>G	NP_000050.3:p.Val1144Gly						-2			-4		-6	Likely benign		criteria_provided,_conflicting_classifications	Conflicting_classifications_of_pathogenicity	Uncertain_significance(2)|Likely_benign(4)
NM_000059.4:c.4159T>A	NP_000050.3:p.Leu1387Ile						-4			-4		-8	Benign		criteria_provided,_conflicting_classifications	Conflicting_classifications_of_pathogenicity	Uncertain_significance(3)|Likely_benign(1)
NM_000059.4:c.4376A>G	NP_000050.3:p.Asn1459Ser			-4			-4			-4		-12	Benign		criteria_provided,_conflicting_classifications	Conflicting_classifications_of_pathogenicity	Uncertain_significance(6)|Likely_benign(4)
NM_000059.4:c.4446_4451dup	NP_000050.3:p.Glu1482_Thr1483dup									-4		-4	Likely benign		-	-	-
NM_000059.4:c.6399_6401del	NP_000050.3:p.Asn2135del									-4		-4	Likely benign		criteria_provided,_conflicting_classifications	Conflicting_classifications_of_pathogenicity	Uncertain_significance(9)|Likely_benign(1)
NM_000059.4:c.6706G>A	NP_000050.3:p.Glu2236Lys			-1			-2			-4		-7	Benign		criteria_provided,_conflicting_classifications	Conflicting_classifications_of_pathogenicity	Uncertain_significance(9)|Likely_benign(2)
NM_000059.4:c.7928C>G	NP_000050.3:p.Ala2643Gly				-4	-1	-8		-4			-17	Benign		criteria_provided,_conflicting_classifications	Conflicting_classifications_of_pathogenicity	Uncertain_significance(4)|Likely_benign(4)
NM_000059.4:c.8633-30A>G	-			-1		-1		-1				-3	Likely benign		-	-	-
NM_000059.4:c.8954-5_8954-2del	-			-4		-1			-4			-9	Benign		-	-	-
NM_000059.4:c.9104A>C	NP_000050.3:p.Tyr3035Ser			-1		-1	-8					-10	Benign		criteria_provided,_conflicting_classifications	Conflicting_classifications_of_pathogenicity	Uncertain_significance(3)|Benign(2)|Likely_benign(4)
NM_000059.4:c.9302T>G	NP_000050.3:p.Leu3101Arg				4	1	1					6	Likely pathogenic		criteria_provided,_conflicting_classifications	Conflicting_classifications_of_pathogenicity	Pathogenic(5)|Likely_pathogenic(4)|Uncertain_significance(1)
NM_000059.4:c.956A>G	NP_000050.3:p.Asn319Ser			-1			-2			-4		-7	Benign		criteria_provided,_conflicting_classifications	Conflicting_classifications_of_pathogenicity	Uncertain_significance(4)|Benign(2)|Likely_benign(6)
NM_000059.4:c.2033A>C	NP_000050.3:p.Asn678Thr			1						-4		-3	Likely benign		criteria_provided,_conflicting_classifications	Conflicting_classifications_of_pathogenicity	Uncertain_significance(4)|Likely_benign(1)
NM_000059.4:c.3256A>G	NP_000050.3:p.Ile1086Val			-4			-2			-4		-10	Benign		criteria_provided,_conflicting_classifications	Conflicting_classifications_of_pathogenicity	Uncertain_significance(3)|Likely_benign(5)
NM_000059.4:c.5813G>C	NP_000050.3:p.Gly1938Ala						2			-4		-2	Likely benign		criteria_provided,_conflicting_classifications	Conflicting_classifications_of_pathogenicity	Uncertain_significance(7)|Likely_benign(2)
NM_000059.4:c.5891A>T	NP_000050.3:p.Lys1964Met									-4		-4	Likely benign		criteria_provided,_conflicting_classifications	Conflicting_classifications_of_pathogenicity	Uncertain_significance(2)|Likely_benign(1)
NM_000059.4:c.6299A>G	NP_000050.3:p.Gln2100Arg									-4		-4	Likely benign		criteria_provided,_conflicting_classifications	Conflicting_classifications_of_pathogenicity	Uncertain_significance(1)|Likely_benign(1)
NM_000059.4:c.7006C>T	NP_000050.3:p.Arg2336Cys			-4					-4	-4		-12	Benign		criteria_provided,_conflicting_classifications	Conflicting_classifications_of_pathogenicity	Uncertain_significance(7)|Benign(1)|Likely_benign(1)
NM_000059.4:c.7522G>A	NP_000050.3:p.Gly2508Ser			-8			-4					-12	Benign		criteria_provided,_conflicting_classifications	Conflicting_classifications_of_pathogenicity	Likely_pathogenic(1)|Uncertain_significance(8)|Benign(2)|Likely_benign(4)
NM_000059.4:c.8117A>G	NP_000050.3:p.Asn2706Ser			-4		-1						-5	Likely benign		criteria_provided,_conflicting_classifications	Conflicting_classifications_of_pathogenicity	Uncertain_significance(4)|Benign(2)|Likely_benign(6)
NM_000059.4:c.316+13A>G	-			-1		-1			-4			-6	Likely benign		criteria_provided,_conflicting_classifications	Conflicting_classifications_of_pathogenicity	Uncertain_significance(2)|Benign(1)|Likely_benign(5)
NM_000059.4:c.353G>A	NP_000050.3:p.Arg118His			-1						-4		-5	Likely benign		criteria_provided,_conflicting_classifications	Conflicting_classifications_of_pathogenicity	Uncertain_significance(5)|Likely_benign(4)
NM_000059.4:c.506A>G	NP_000050.3:p.Lys169Arg			-1	-4		-2		-4			-11	Benign		criteria_provided,_conflicting_classifications	Conflicting_classifications_of_pathogenicity	Uncertain_significance(4)|Benign(2)|Likely_benign(7)
NM_000059.4:c.516+93C>T	-			-4		-1		-1				-6	Likely benign		-	-	-
NM_000059.4:c.631+15T>C	-			1		-1		-1				-1	Likely benign		-	-	-
NM_000059.4:c.644_646delAAG	NP_000050.3:p.Glu215del									-4		-4	Likely benign		-	-	-
NM_000059.4:c.714_716dupAAG	NP_000050.3:p.Glu238_Ser239insArg									-4		-4	Likely benign		-	-	-
NM_000059.4:c.740T>C	NP_000050.3:p.Ile247Thr									-4		-4	Likely benign		criteria_provided,_conflicting_classifications	Conflicting_classifications_of_pathogenicity	Uncertain_significance(3)|Likely_benign(1)
NM_000059.4:c.742G>A	NP_000050.3:p.Ala248Thr			-4						-4		-8	Benign		criteria_provided,_conflicting_classifications	Conflicting_classifications_of_pathogenicity	Uncertain_significance(7)|Benign(2)|Likely_benign(4)
NM_000059.4:c.825A>T	NP_000050.3:p.Lys275Asn						-2			-4		-6	Likely benign		criteria_provided,_conflicting_classifications	Conflicting_classifications_of_pathogenicity	Uncertain_significance(6)|Likely_benign(2)
NM_000059.4:c.1220A>G	NP_000050.3:p.Gln407Arg			1						-4		-3	Likely benign		criteria_provided,_conflicting_classifications	Conflicting_classifications_of_pathogenicity	Uncertain_significance(3)|Likely_benign(1)
NM_000059.4:c.1352G>A	NP_000050.3:p.Ser451Asn									-4		-4	Likely benign		criteria_provided,_conflicting_classifications	Conflicting_classifications_of_pathogenicity	Uncertain_significance(2)|Likely_benign(1)
NM_000059.4:c.1460C>A	NP_000050.3:p.Ala487Glu			-4			-2			-4		-10	Benign		criteria_provided,_conflicting_classifications	Conflicting_classifications_of_pathogenicity	Uncertain_significance(2)|Benign(3)|Likely_benign(9)
NM_000059.4:c.1597A>G	NP_000050.3:p.Thr533Ala			1						-4		-3	Likely benign		criteria_provided,_conflicting_classifications	Conflicting_classifications_of_pathogenicity	Uncertain_significance(2)|Likely_benign(1)
NM_000059.4:c.1820A>C	NP_000050.3:p.Lys607Thr			-1			-1			-4		-6	Likely benign		criteria_provided,_conflicting_classifications	Conflicting_classifications_of_pathogenicity	Uncertain_significance(1)|Likely_benign(10)
NM_000059.4:c.2148G>C	NP_000050.3:p.Gln716His									-4		-4	Likely benign		criteria_provided,_conflicting_classifications	Conflicting_classifications_of_pathogenicity	Uncertain_significance(4)|Likely_benign(2)
NM_000059.4:c.2563A>G	NP_000050.3:p.Thr855Ala			1						-4		-3	Likely benign		criteria_provided,_conflicting_classifications	Conflicting_classifications_of_pathogenicity	Uncertain_significance(1)|Likely_benign(1)
NM_000059.4:c.2683G>T	NP_000050.3:p.Ala895Ser			1						-4		-3	Likely benign		criteria_provided,_conflicting_classifications	Conflicting_classifications_of_pathogenicity	Uncertain_significance(3)|Likely_benign(1)
NM_000059.4:c.3137A>G	NP_000050.3:p.Glu1046Gly									-4		-4	Likely benign		criteria_provided,_conflicting_classifications	Conflicting_classifications_of_pathogenicity	Uncertain_significance(6)|Likely_benign(2)
NM_000059.4:c.3218A>G	NP_000050.3:p.Gln1073Arg			-4			1			-4		-7	Benign		criteria_provided,_conflicting_classifications	Conflicting_classifications_of_pathogenicity	Uncertain_significance(4)|Likely_benign(6)
NM_000059.4:c.3262C>T	NP_000050.3:p.Pro1088Ser			-4			-8			-4		-16	Benign		criteria_provided,_conflicting_classifications	Conflicting_classifications_of_pathogenicity	Uncertain_significance(3)|Benign(3)|Likely_benign(8)
NM_000059.4:c.3509C>T	NP_000050.3:p.Ala1170Val				-4		2			-4		-6	Likely benign		criteria_provided,_conflicting_classifications	Conflicting_classifications_of_pathogenicity	Uncertain_significance(3)|Benign(1)|Likely_benign(5)
NM_000059.4:c.4146_4148del	NP_000050.3:p.Glu1382del			-1			-8			-4		-13	Benign		-	-	-
NM_000059.4:c.4343A>T	NP_000050.3:p.Asn1448Ile									-4		-4	Likely benign		criteria_provided,_conflicting_classifications	Conflicting_classifications_of_pathogenicity	Uncertain_significance(2)|Likely_benign(1)
NM_000059.4:c.4828G>A	NP_000050.3:p.Val1610Met			-4			-2		-4	-4		-14	Benign		criteria_provided,_conflicting_classifications	Conflicting_classifications_of_pathogenicity	Uncertain_significance(2)|Benign(4)|Likely_benign(4)
NM_000059.4:c.4850G>A	NP_000050.3:p.Ser1617Asn									-4		-4	Likely benign		criteria_provided,_conflicting_classifications	Conflicting_classifications_of_pathogenicity	Uncertain_significance(4)|Likely_benign(5)
NM_000059.4:c.5714A>G	NP_000050.3:p.His1905Arg						-2			-4		-6	Likely benign		criteria_provided,_conflicting_classifications	Conflicting_classifications_of_pathogenicity	Uncertain_significance(3)|Likely_benign(3)
NM_000059.4:c.5937C>G	NP_000050.3:p.Ser1979Arg						-1			-4		-5	Likely benign		criteria_provided,_conflicting_classifications	Conflicting_classifications_of_pathogenicity	Uncertain_significance(7)|Likely_benign(2)
NM_000059.4:c.6073C>G	NP_000050.3:p.Leu2025Val									-4		-4	Likely benign		-	-	-
NM_000059.4:c.6287C>G	NP_000050.3:p.Pro2096Arg						-1			-4		-5	Likely benign		criteria_provided,_conflicting_classifications	Conflicting_classifications_of_pathogenicity	Uncertain_significance(9)|Likely_benign(1)
NM_000059.4:c.6683T>C	NP_000050.3:p.Val2228Ala						-2			-4		-6	Likely benign		criteria_provided,_conflicting_classifications	Conflicting_classifications_of_pathogenicity	Uncertain_significance(6)|Likely_benign(2)
NM_000059.4:c.6739A>G	NP_000050.3:p.Ser2247Gly			-1						-4		-5	Likely benign		criteria_provided,_conflicting_classifications	Conflicting_classifications_of_pathogenicity	Uncertain_significance(3)|Benign(1)|Likely_benign(6)
NM_000059.4:c.6842-43A>C	-			1		-1		-1				-1	Likely benign		-	-	-
NM_000059.4:c.7010C>T	NP_000050.3:p.Thr2337Ile			-1			-1		-4	-4		-10	Benign		criteria_provided,_multiple_submitters,_no_conflicts	Uncertain_significance	-
NM_000059.4:c.7435+5T>C	-			1		-1			-4			-4	Likely benign		criteria_provided,_conflicting_classifications	Conflicting_classifications_of_pathogenicity	Uncertain_significance(4)|Likely_benign(1)
NM_000059.4:c.7628A>G	NP_000050.3:p.Tyr2543Cys			-1		-1						-2	Likely benign		criteria_provided,_multiple_submitters,_no_conflicts	Uncertain_significance	-
NM_000059.4:c.7822C>G	NP_000050.3:p.Pro2608Ala				-4	-1			-4			-9	Benign		criteria_provided,_conflicting_classifications	Conflicting_classifications_of_pathogenicity	Uncertain_significance(6)|Likely_benign(1)
NM_000059.4:c.8039A>G	NP_000050.3:p.Asp2680Gly			1	-4							-3	Likely benign		criteria_provided,_conflicting_classifications	Conflicting_classifications_of_pathogenicity	Uncertain_significance(2)|Likely_benign(1)
NM_000059.4:c.8215G>A	NP_000050.3:p.Val2739Ile			-4	-4	-1	1					-8	Benign		criteria_provided,_conflicting_classifications	Conflicting_classifications_of_pathogenicity	Uncertain_significance(6)|Benign(2)|Likely_benign(6)
NM_000059.4:c.8359C>T	NP_000050.3:p.Arg2787Cys				-4	-1			-4			-9	Benign		criteria_provided,_conflicting_classifications	Conflicting_classifications_of_pathogenicity	Uncertain_significance(3)|Benign(1)|Likely_benign(4)
NM_000059.4:c.8375T>C	NP_000050.3:p.Leu2792Pro				4	1	1					6	Likely pathogenic		criteria_provided,_conflicting_classifications	Conflicting_classifications_of_pathogenicity	Likely_pathogenic(3)|Uncertain_significance(1)
NM_000059.4:c.8567A>C	NP_000050.3:p.Glu2856Ala			-8	-4	-1	-8					-21	Benign		criteria_provided,_conflicting_classifications	Conflicting_classifications_of_pathogenicity	Uncertain_significance(1)|Benign(13)|Likely_benign(12)
NM_000059.4:c.8850G>T	NP_000050.3:p.Lys2950Asn			-8	-4	-1	-8		-4			-25	Benign		criteria_provided,_conflicting_classifications	Conflicting_classifications_of_pathogenicity	Uncertain_significance(2)|Benign(9)|Likely_benign(14)
NM_000059.4:c.9104A>G	NP_000050.3:p.Tyr3035Cys			-1	-4	-1	-2		-4			-12	Benign		criteria_provided,_conflicting_classifications	Conflicting_classifications_of_pathogenicity	Uncertain_significance(2)|Likely_benign(5)
NM_000059.4:c.9334G>A	NP_000050.3:p.Asp3112Asn				-4	-1						-5	Likely benign		criteria_provided,_conflicting_classifications	Conflicting_classifications_of_pathogenicity	Uncertain_significance(3)|Likely_benign(1)
NM_000059.4:c.9364G>A	NP_000050.3:p.Ala3122Thr			-4		-1	2					-3	Likely benign		criteria_provided,_conflicting_classifications	Conflicting_classifications_of_pathogenicity	Uncertain_significance(1)|Likely_benign(6)
NM_000059.4:c.*31C>T	-			-8								-8	Benign		-	-	-
NM_000059.4:c.887A>G	NP_000050.3:p.Tyr296Cys									-4		-4	Likely benign		criteria_provided,_conflicting_classifications	Conflicting_classifications_of_pathogenicity	Uncertain_significance(3)|Likely_benign(7)
NM_000059.4:c.1054T>C	NP_000050.3:p.Tyr352His									-4		-4	Likely benign		criteria_provided,_conflicting_classifications	Conflicting_classifications_of_pathogenicity	Uncertain_significance(2)|Benign(1)|Likely_benign(5)
NM_000059.4:c.1826A>G	NP_000050.3:p.Gln609Arg						-4			-4		-8	Benign		criteria_provided,_conflicting_classifications	Conflicting_classifications_of_pathogenicity	Uncertain_significance(6)|Likely_benign(1)
NM_000059.4:c.2122T>A	NP_000050.3:p.Ser708Thr			-4						-4		-8	Benign		criteria_provided,_conflicting_classifications	Conflicting_classifications_of_pathogenicity	Uncertain_significance(6)|Likely_benign(2)
NM_000059.4:c.2473A>G	NP_000050.3:p.Asn825Asp			1						-4		-3	Likely benign		criteria_provided,_conflicting_classifications	Conflicting_classifications_of_pathogenicity	Uncertain_significance(2)|Likely_benign(1)
NM_000059.4:c.4277C>T	NP_000050.3:p.Thr1426Ile									-4		-4	Likely benign		criteria_provided,_conflicting_classifications	Conflicting_classifications_of_pathogenicity	Uncertain_significance(5)|Likely_benign(2)
NM_000059.4:c.5518G>C	NP_000050.3:p.Gly1840Arg			1						-4		-3	Likely benign		criteria_provided,_conflicting_classifications	Conflicting_classifications_of_pathogenicity	Uncertain_significance(4)|Likely_benign(1)
NM_000059.4:c.6986C>T	NP_000050.3:p.Pro2329Leu									-4		-4	Likely benign		criteria_provided,_conflicting_classifications	Conflicting_classifications_of_pathogenicity	Uncertain_significance(6)|Likely_benign(1)
NM_000059.4:c.7484T>C	NP_000050.3:p.Ile2495Thr				-4	-1	-2					-7	Benign		criteria_provided,_conflicting_classifications	Conflicting_classifications_of_pathogenicity	Uncertain_significance(4)|Likely_benign(3)
NM_000059.4:c.7712A>G	NP_000050.3:p.Glu2571Gly			-4	-4							-8	Benign		criteria_provided,_conflicting_classifications	Conflicting_classifications_of_pathogenicity	Uncertain_significance(4)|Benign(1)|Likely_benign(5)
NM_000059.4:c.8686C>T	NP_000050.3:p.Arg2896Cys			-4	-4	-1			-4			-13	Benign		criteria_provided,_conflicting_classifications	Conflicting_classifications_of_pathogenicity	Uncertain_significance(8)|Likely_benign(1)
NM_000059.4:c.9767A>G	NP_000050.3:p.Glu3256Gly									-4		-4	Likely benign		criteria_provided,_single_submitter	Uncertain_significance	-
NM_000059.4:c.?_-228_67+1_68-1del	NP_000050.3:p.Met1?	PVS1	8								4	12	Pathogenic		-	-	-
NM_000059.4:c.28A>G	NP_000050.3:p.Thr10Ala			1		-1	-1					-1	Likely benign		criteria_provided,_conflicting_classifications	Conflicting_classifications_of_pathogenicity	Uncertain_significance(4)|Likely_benign(2)
NM_000059.4:c.332A>G	NP_000050.3:p.Asn111Ser			1						-4		-3	Likely benign		criteria_provided,_conflicting_classifications	Conflicting_classifications_of_pathogenicity	Uncertain_significance(1)|Likely_benign(1)
NM_000059.4:c.451G>C	NP_000050.3:p.Val151Leu			1						-4		-3	Likely benign		-	-	-
NM_000059.4:c.480A>C	NP_000050.3:p.Val160=			1						-4		-3	Likely benign		-	-	-
NM_000059.4:c.480A>T	NP_000050.3:p.Val160=			1						-4		-3	Likely benign		criteria_provided,_single_submitter	Likely_benign	-
NM_000059.4:c.575T>C	NP_000050.3:p.Met192Thr			1			-2		-4	-4		-9	Benign		criteria_provided,_conflicting_classifications	Conflicting_classifications_of_pathogenicity	Uncertain_significance(7)|Likely_benign(2)
NM_000059.4:c.800G>A	NP_000050.3:p.Gly267Glu			-1			-8			-4		-13	Benign		criteria_provided,_conflicting_classifications	Conflicting_classifications_of_pathogenicity	Uncertain_significance(4)|Likely_benign(5)
NM_000059.4:c.831T>G	NP_000050.3:p.Asn277Lys			-1	-4		-8			-4		-17	Benign		reviewed_by_expert_panel	Benign	-
NM_000059.4:c.865A>G	NP_000050.3:p.Asn289Asp									-4		-4	Likely benign		criteria_provided,_conflicting_classifications	Conflicting_classifications_of_pathogenicity	Uncertain_significance(4)|Likely_benign(7)
NM_000059.4:c.1466C>G	NP_000050.3:p.Ser489Cys			-1			-2			-4		-7	Benign		criteria_provided,_conflicting_classifications	Conflicting_classifications_of_pathogenicity	Uncertain_significance(8)|Likely_benign(4)
NM_000059.4:c.1472C>G	NP_000050.3:p.Thr491Ser									-4		-4	Likely benign		criteria_provided,_conflicting_classifications	Conflicting_classifications_of_pathogenicity	Uncertain_significance(3)|Likely_benign(2)
NM_000059.4:c.1478C>T	NP_000050.3:p.Pro493Leu			1						-4		-3	Likely benign		criteria_provided,_conflicting_classifications	Conflicting_classifications_of_pathogenicity	Uncertain_significance(4)|Likely_benign(4)
NM_000059.4:c.1574C>T	NP_000050.3:p.Thr525Ile			1						-4		-3	Likely benign		criteria_provided,_conflicting_classifications	Conflicting_classifications_of_pathogenicity	Uncertain_significance(4)|Likely_benign(1)
NM_000059.4:c.1879G>A	NP_000050.3:p.Ala627Thr			1						-4		-3	Likely benign		criteria_provided,_conflicting_classifications	Conflicting_classifications_of_pathogenicity	Uncertain_significance(1)|Likely_benign(1)
NM_000059.4:c.2320A>G	NP_000050.3:p.Thr774Ala			-1			-2			-4		-7	Benign		criteria_provided,_conflicting_classifications	Conflicting_classifications_of_pathogenicity	Uncertain_significance(2)|Benign(4)|Likely_benign(5)
NM_000059.4:c.2459A>G	NP_000050.3:p.Asp820Gly			-1						-4		-5	Likely benign		criteria_provided,_conflicting_classifications	Conflicting_classifications_of_pathogenicity	Uncertain_significance(3)|Likely_benign(6)
NM_000059.4:c.2875G>A	NP_000050.3:p.Val959Ile			1						-4		-3	Likely benign		criteria_provided,_conflicting_classifications	Conflicting_classifications_of_pathogenicity	Uncertain_significance(2)|Likely_benign(2)
NM_000059.4:c.2920G>A	NP_000050.3:p.Asp974Asn			-4			-2			-4		-10	Benign		criteria_provided,_conflicting_classifications	Conflicting_classifications_of_pathogenicity	Uncertain_significance(3)|Likely_benign(4)
NM_000059.4:c.2944A>C	NP_000050.3:p.Ile982Leu			-1			-8			-4		-13	Benign		criteria_provided,_conflicting_classifications	Conflicting_classifications_of_pathogenicity	Uncertain_significance(3)|Benign(2)|Likely_benign(6)
NM_000059.4:c.2957A>G	NP_000050.3:p.Asn986Ser			-1	-4					-4		-9	Benign		criteria_provided,_conflicting_classifications	Conflicting_classifications_of_pathogenicity	Uncertain_significance(5)|Benign(1)|Likely_benign(5)
NM_000059.4:c.2971A>T	NP_000050.3:p.Asn991Tyr			1						-4		-3	Likely benign		-	-	-
NM_000059.4:c.3245A>G	NP_000050.3:p.Lys1082Arg									-4		-4	Likely benign		criteria_provided,_conflicting_classifications	Conflicting_classifications_of_pathogenicity	Uncertain_significance(9)|Likely_benign(1)
NM_000059.4:c.3263C>T	NP_000050.3:p.Pro1088Leu						1			-4		-3	Likely benign		criteria_provided,_conflicting_classifications	Conflicting_classifications_of_pathogenicity	Uncertain_significance(4)|Likely_benign(1)
NM_000059.4:c.3762G>T	NP_000050.3:p.Glu1254Asp									-4		-4	Likely benign		criteria_provided,_conflicting_classifications	Conflicting_classifications_of_pathogenicity	Uncertain_significance(6)|Likely_benign(2)
NM_000059.4:c.3814A>G	NP_000050.3:p.Met1272Val									-4		-4	Likely benign		criteria_provided,_conflicting_classifications	Conflicting_classifications_of_pathogenicity	Uncertain_significance(2)|Benign(1)|Likely_benign(6)
NM_000059.4:c.3863A>T	NP_000050.3:p.Asn1288Ile									-4		-4	Likely benign		criteria_provided,_conflicting_classifications	Conflicting_classifications_of_pathogenicity	Uncertain_significance(3)|Likely_benign(1)
NM_000059.4:c.4229C>G	NP_000050.3:p.Thr1410Ser			1						-4		-3	Likely benign		-	-	-
NM_000059.4:c.4357A>G	NP_000050.3:p.Lys1453Glu									-4		-4	Likely benign		criteria_provided,_conflicting_classifications	Conflicting_classifications_of_pathogenicity	Uncertain_significance(7)|Likely_benign(1)
NM_000059.4:c.4901T>C	NP_000050.3:p.Phe1634Ser						-1			-4		-5	Likely benign		criteria_provided,_conflicting_classifications	Conflicting_classifications_of_pathogenicity	Uncertain_significance(3)|Likely_benign(4)
NM_000059.4:c.4952C>T	NP_000050.3:p.Pro1651Leu			-1						-4		-5	Likely benign		criteria_provided,_conflicting_classifications	Conflicting_classifications_of_pathogenicity	Uncertain_significance(4)|Likely_benign(1)
NM_000059.4:c.4970A>G	NP_000050.3:p.Asn1657Ser			1						-4		-3	Likely benign		criteria_provided,_conflicting_classifications	Conflicting_classifications_of_pathogenicity	Uncertain_significance(1)|Likely_benign(1)
NM_000059.4:c.5593A>G	NP_000050.3:p.Ile1865Val			1			-1			-4		-4	Likely benign		criteria_provided,_conflicting_classifications	Conflicting_classifications_of_pathogenicity	Uncertain_significance(4)|Likely_benign(1)
NM_000059.4:c.5663A>G	NP_000050.3:p.Lys1888Arg									-4		-4	Likely benign		criteria_provided,_conflicting_classifications	Conflicting_classifications_of_pathogenicity	Uncertain_significance(9)|Likely_benign(2)
NM_000059.4:c.5777G>A	NP_000050.3:p.Ser1926Asn									-4		-4	Likely benign		criteria_provided,_conflicting_classifications	Conflicting_classifications_of_pathogenicity	Uncertain_significance(4)|Likely_benign(2)
NM_000059.4:c.5840C>T	NP_000050.3:p.Pro1947Leu			1						-4		-3	Likely benign		criteria_provided,_conflicting_classifications	Conflicting_classifications_of_pathogenicity	Uncertain_significance(1)|Likely_benign(1)
NM_000059.4:c.5972C>T	NP_000050.3:p.Ala1991Val			1						-4		-3	Likely benign		criteria_provided,_conflicting_classifications	Conflicting_classifications_of_pathogenicity	Uncertain_significance(2)|Likely_benign(1)
NM_000059.4:c.6215C>G	NP_000050.3:p.Ser2072Cys			-1			-4			-4		-9	Benign		criteria_provided,_conflicting_classifications	Conflicting_classifications_of_pathogenicity	Uncertain_significance(6)|Likely_benign(3)
NM_000059.4:c.6424T>C	NP_000050.3:p.Ser2142Pro			1						-4		-3	Likely benign		criteria_provided,_conflicting_classifications	Conflicting_classifications_of_pathogenicity	Uncertain_significance(3)|Likely_benign(1)
NM_000059.4:c.6613G>A	NP_000050.3:p.Val2205Met						-2			-4		-6	Likely benign		criteria_provided,_conflicting_classifications	Conflicting_classifications_of_pathogenicity	Uncertain_significance(7)|Likely_benign(4)
NM_000059.4:c.6691G>A	NP_000050.3:p.Ala2231Thr			1						-4		-3	Likely benign		criteria_provided,_conflicting_classifications	Conflicting_classifications_of_pathogenicity	Uncertain_significance(3)|Likely_benign(2)
NM_000059.4:c.6761T>A	NP_000050.3:p.Phe2254Tyr			1						-4		-3	Likely benign		criteria_provided,_conflicting_classifications	Conflicting_classifications_of_pathogenicity	Uncertain_significance(7)|Likely_benign(2)
NM_000059.4:c.6821G>T	NP_000050.3:p.Gly2274Val			-4			-4		-4	-4		-16	Benign		criteria_provided,_conflicting_classifications	Conflicting_classifications_of_pathogenicity	Uncertain_significance(2)|Benign(4)|Likely_benign(10)
NM_000059.4:c.6826C>T	NP_000050.3:p.Pro2276Ser			1			-1			-4		-4	Likely benign		criteria_provided,_conflicting_classifications	Conflicting_classifications_of_pathogenicity	Uncertain_significance(2)|Likely_benign(1)
NM_000059.4:c.6938-25_6938-19delGTAATAT	-			-4		-1						-5	Likely benign		-	-	-
NM_000059.4:c.7102T>G	NP_000050.3:p.Leu2368Val			-4						-4		-8	Benign		criteria_provided,_conflicting_classifications	Conflicting_classifications_of_pathogenicity	Uncertain_significance(2)|Benign(4)|Likely_benign(2)
NM_000059.4:c.7181G>A	NP_000050.3:p.Arg2394Lys			1						-4		-3	Likely benign		-	-	-
NM_000059.4:c.7565C>T	NP_000050.3:p.Ser2522Phe				-4	1	-1					-4	Likely benign		criteria_provided,_conflicting_classifications	Conflicting_classifications_of_pathogenicity	Uncertain_significance(2)|Benign(1)|Likely_benign(4)
NM_000059.4:c.7795_7797delGAA	NP_000050.3:p.Glu2599del					1	8					9	Likely pathogenic		-	-	-
NM_000059.4:c.8007A>G	NP_000050.3:p.Arg2669=					-1			-4			-5	Likely benign		criteria_provided,_conflicting_classifications	Conflicting_classifications_of_pathogenicity	Uncertain_significance(4)|Benign(1)|Likely_benign(3)
NM_000059.4:c.8023_8026del	NP_000050.3:p.Ile2675TrpfsTer18	PVS1	8								4	12	Pathogenic		-	-	-
NM_000059.4:c.8092G>A	NP_000050.3:p.Ala2698Thr			-4		-1						-5	Likely benign		criteria_provided,_conflicting_classifications	Conflicting_classifications_of_pathogenicity	Uncertain_significance(6)|Likely_benign(7)
NM_000059.4:c.8356G>A	NP_000050.3:p.Ala2786Thr			-4		-1	-1					-6	Likely benign		criteria_provided,_conflicting_classifications	Conflicting_classifications_of_pathogenicity	Uncertain_significance(5)|Likely_benign(6)
NM_000059.4:c.8430T>C	NP_000050.3:p.Ser2810=			1		-1		-1				-1	Likely benign		-	-	-
NM_000059.4:c.8443G>A	NP_000050.3:p.Val2815Ile			1	-4	-1						-4	Likely benign		criteria_provided,_single_submitter	Uncertain_significance	-
NM_000059.4:c.9190G>A	NP_000050.3:p.Asp3064Asn				-4	-1						-5	Likely benign		criteria_provided,_conflicting_classifications	Conflicting_classifications_of_pathogenicity	Uncertain_significance(2)|Benign(1)|Likely_benign(5)
NM_000059.4:c.9218A>G	NP_000050.3:p.Asp3073Gly			1	4	1						6	Likely pathogenic		criteria_provided,_conflicting_classifications	Conflicting_classifications_of_pathogenicity	Likely_pathogenic(3)|Uncertain_significance(6)
NM_000059.4:c.9648+17T>G	-			1		-1		-1				-1	Likely benign		-	-	-
NM_000059.4:c.449A>G	NP_000050.3:p.His150Arg									-4		-4	Likely benign		criteria_provided,_multiple_submitters,_no_conflicts	Uncertain_significance	-
NM_000059.4:c.598A>G	NP_000050.3:p.Thr200Ala			1					-4	-4		-7	Benign		criteria_provided,_multiple_submitters,_no_conflicts	Uncertain_significance	-
NM_000059.4:c.638A>C	NP_000050.3:p.Asn213Thr			1						-4		-3	Likely benign		-	-	-
NM_000059.4:c.916G>A	NP_000050.3:p.Asp306Asn									-4		-4	Likely benign		criteria_provided,_conflicting_classifications	Conflicting_classifications_of_pathogenicity	Uncertain_significance(2)|Likely_benign(1)
NM_000059.4:c.1742C>A	NP_000050.3:p.Ser581Tyr			1						-4		-3	Likely benign		-	-	-
NM_000059.4:c.3516G>C	NP_000050.3:p.Ser1172=			1						-4		-3	Likely benign		-	-	-
NM_000059.4:c.3551G>C	NP_000050.3:p.Gly1184Ala			1						-4		-3	Likely benign		criteria_provided,_conflicting_classifications	Conflicting_classifications_of_pathogenicity	Uncertain_significance(3)|Likely_benign(1)
NM_000059.4:c.3901A>T	NP_000050.3:p.Thr1301Ser									-4		-4	Likely benign		criteria_provided,_conflicting_classifications	Conflicting_classifications_of_pathogenicity	Uncertain_significance(4)|Likely_benign(1)
NM_000059.4:c.4054G>A	NP_000050.3:p.Asp1352Asn			1						-4		-3	Likely benign		criteria_provided,_conflicting_classifications	Conflicting_classifications_of_pathogenicity	Uncertain_significance(1)|Likely_benign(1)
NM_000059.4:c.4336A>G	NP_000050.3:p.Ile1446Val			1						-4		-3	Likely benign		criteria_provided,_conflicting_classifications	Conflicting_classifications_of_pathogenicity	Uncertain_significance(2)|Likely_benign(2)
NM_000059.4:c.5537T>A	NP_000050.3:p.Ile1846Lys			1						-4		-3	Likely benign		criteria_provided,_conflicting_classifications	Conflicting_classifications_of_pathogenicity	Uncertain_significance(1)|Likely_benign(1)
NM_000059.4:c.5695_5697delGAT	NP_000050.3:p.Asp1899del									-4		-4	Likely benign		-	-	-
NM_000059.4:c.5986G>A	NP_000050.3:p.Ala1996Thr			-8						-4		-12	Benign		criteria_provided,_conflicting_classifications	Conflicting_classifications_of_pathogenicity	Uncertain_significance(3)|Benign(3)|Likely_benign(8)
NM_000059.4:c.6329A>C	NP_000050.3:p.Asp2110Ala			1						-4		-3	Likely benign		criteria_provided,_conflicting_classifications	Conflicting_classifications_of_pathogenicity	Uncertain_significance(5)|Likely_benign(1)
NM_000059.4:c.6710A>T	NP_000050.3:p.Asp2237Val			1						-4		-3	Likely benign		-	-	-
NM_000059.4:c.6915G>A	NP_000050.3:p.Lys2305=			1						-4		-3	Likely benign		criteria_provided,_conflicting_classifications	Conflicting_classifications_of_pathogenicity	Uncertain_significance(2)|Likely_benign(4)
NM_000059.4:c.7040C>A	NP_000050.3:p.Pro2347Gln			1			-2			-4		-5	Likely benign		criteria_provided,_multiple_submitters,_no_conflicts	Uncertain_significance	-
NM_000059.4:c.7488G>C	NP_000050.3:p.Lys2496Asn			-1		-1						-2	Likely benign		criteria_provided,_multiple_submitters,_no_conflicts	Uncertain_significance	-
NM_000059.4:c.9155G>A	NP_000050.3:p.Arg3052Gln					1	-4					-3	Likely benign		criteria_provided,_conflicting_classifications	Conflicting_classifications_of_pathogenicity	Uncertain_significance(2)|Likely_benign(5)
NM_000059.4:c.9617_9619dup	NP_000050.3:p.Gln3206_Ile3207insLys									-4		-4	Likely benign		-	-	-
NM_000059.4:c.9809C>A	NP_000050.3:p.Ala3270Asp			1						-4		-3	Likely benign		-	-	-
NM_000059.4:c.9914G>A	NP_000050.3:p.Gly3305Asp			1						-4		-3	Likely benign		criteria_provided,_multiple_submitters,_no_conflicts	Uncertain_significance	-
NM_000059.4:c.67+79C>T	-					-1		-1				-2	Likely benign		-	-	-
NM_000059.4:c.67+110T>A	-			1		-1		-1				-1	Likely benign		-	-	-
NM_000059.4:c.521G>A	NP_000050.3:p.Arg174His								-4	-4		-8	Benign		criteria_provided,_conflicting_classifications	Conflicting_classifications_of_pathogenicity	Uncertain_significance(3)|Likely_benign(3)
NM_000059.4:c.587G>C	NP_000050.3:p.Ser196Thr			1						-4		-3	Likely benign		criteria_provided,_single_submitter	Uncertain_significance	-
NM_000059.4:c.631+180A>G	-			-1		-1		-1				-3	Likely benign		-	-	-
NM_000059.4:c.1166C>T	NP_000050.3:p.Pro389Leu			-4						-4		-8	Benign		criteria_provided,_conflicting_classifications	Conflicting_classifications_of_pathogenicity	Uncertain_significance(3)|Benign(1)|Likely_benign(5)
NM_000059.4:c.1196C>A	NP_000050.3:p.Thr399Asn			1						-4		-3	Likely benign		criteria_provided,_conflicting_classifications	Conflicting_classifications_of_pathogenicity	Uncertain_significance(1)|Likely_benign(1)
NM_000059.4:c.1244A>G	NP_000050.3:p.His415Arg						-2			-4		-6	Likely benign		criteria_provided,_conflicting_classifications	Conflicting_classifications_of_pathogenicity	Uncertain_significance(8)|Likely_benign(3)
NM_000059.4:c.1283T>C	NP_000050.3:p.Leu428Pro			1						-4		-3	Likely benign		criteria_provided,_conflicting_classifications	Conflicting_classifications_of_pathogenicity	Uncertain_significance(1)|Likely_benign(1)
NM_000059.4:c.1732G>C	NP_000050.3:p.Gly578Arg			1						-4		-3	Likely benign		criteria_provided,_conflicting_classifications	Conflicting_classifications_of_pathogenicity	Likely_pathogenic(1)|Uncertain_significance(2)|Likely_benign(1)
NM_000059.4:c.1909+85A>G	-					-1		-1				-2	Likely benign		-	-	-
NM_000059.4:c.2046C>G	NP_000050.3:p.Ile682Met			1						-4		-3	Likely benign		-	-	-
NM_000059.4:c.2810A>C	NP_000050.3:p.Gln937Pro								-4	-4		-8	Benign		criteria_provided,_conflicting_classifications	Conflicting_classifications_of_pathogenicity	Uncertain_significance(6)|Likely_benign(1)
NM_000059.4:c.3010A>G	NP_000050.3:p.Ser1004Gly			1						-4		-3	Likely benign		criteria_provided,_conflicting_classifications	Conflicting_classifications_of_pathogenicity	Uncertain_significance(4)|Likely_benign(2)
NM_000059.4:c.3540G>C	NP_000050.3:p.Lys1180Asn									-4		-4	Likely benign		criteria_provided,_conflicting_classifications	Conflicting_classifications_of_pathogenicity	Uncertain_significance(5)|Likely_benign(1)
NM_000059.4:c.3630T>G	NP_000050.3:p.Asp1210Glu			1						-4		-3	Likely benign		criteria_provided,_conflicting_classifications	Conflicting_classifications_of_pathogenicity	Uncertain_significance(5)|Likely_benign(1)
NM_000059.4:c.3770C>T	NP_000050.3:p.Pro1257Leu			1						-4		-3	Likely benign		criteria_provided,_conflicting_classifications	Conflicting_classifications_of_pathogenicity	Uncertain_significance(3)|Likely_benign(1)
NM_000059.4:c.4537G>A	NP_000050.3:p.Asp1513Asn			1						-4		-3	Likely benign		criteria_provided,_conflicting_classifications	Conflicting_classifications_of_pathogenicity	Uncertain_significance(3)|Likely_benign(1)
NM_000059.4:c.4885A>G	NP_000050.3:p.Thr1629Ala			1						-4		-3	Likely benign		criteria_provided,_conflicting_classifications	Conflicting_classifications_of_pathogenicity	Uncertain_significance(3)|Likely_benign(1)
NM_000059.4:c.5282G>A	NP_000050.3:p.Gly1761Glu			1						-4		-3	Likely benign		criteria_provided,_conflicting_classifications	Conflicting_classifications_of_pathogenicity	Uncertain_significance(3)|Likely_benign(2)
NM_000059.4:c.5411T>C	NP_000050.3:p.Val1804Ala			-4						-4		-8	Benign		criteria_provided,_conflicting_classifications	Conflicting_classifications_of_pathogenicity	Uncertain_significance(7)|Likely_benign(4)
NM_000059.4:c.5428G>A	NP_000050.3:p.Val1810Ile									-4		-4	Likely benign		criteria_provided,_conflicting_classifications	Conflicting_classifications_of_pathogenicity	Uncertain_significance(7)|Likely_benign(2)
NM_000059.4:c.5495C>A	NP_000050.3:p.Ser1832Tyr			-4			1			-4		-7	Benign		criteria_provided,_conflicting_classifications	Conflicting_classifications_of_pathogenicity	Uncertain_significance(3)|Likely_benign(5)
NM_000059.4:c.5869A>G	NP_000050.3:p.Ile1957Val			-1			-2			-4		-7	Benign		criteria_provided,_conflicting_classifications	Conflicting_classifications_of_pathogenicity	Uncertain_significance(6)|Likely_benign(4)
NM_000059.4:c.5897A>G	NP_000050.3:p.His1966Arg									-4		-4	Likely benign		criteria_provided,_conflicting_classifications	Conflicting_classifications_of_pathogenicity	Uncertain_significance(3)|Benign(1)|Likely_benign(4)
NM_000059.4:c.6017G>C	NP_000050.3:p.Ser2006Thr									-4		-4	Likely benign		criteria_provided,_conflicting_classifications	Conflicting_classifications_of_pathogenicity	Uncertain_significance(6)|Likely_benign(1)
NM_000059.4:c.6293C>T	NP_000050.3:p.Ser2098Phe			-1			-2			-4		-7	Benign		criteria_provided,_conflicting_classifications	Conflicting_classifications_of_pathogenicity	Uncertain_significance(6)|Likely_benign(3)
NM_000059.4:c.6403A>C	NP_000050.3:p.Asn2135His									-4		-4	Likely benign		criteria_provided,_conflicting_classifications	Conflicting_classifications_of_pathogenicity	Uncertain_significance(5)|Likely_benign(1)
NM_000059.4:c.6434A>G	NP_000050.3:p.Asn2145Ser									-4		-4	Likely benign		criteria_provided,_conflicting_classifications	Conflicting_classifications_of_pathogenicity	Uncertain_significance(5)|Likely_benign(1)
NM_000059.4:c.6886A>C	NP_000050.3:p.Ile2296Leu			-8			-2		-4	-4		-18	Benign		criteria_provided,_conflicting_classifications	Conflicting_classifications_of_pathogenicity	Uncertain_significance(3)|Likely_benign(8)
NM_000059.4:c.7007+87A>G	-			1		-1		-1				-1	Likely benign		-	-	-
NM_000059.4:c.7008-5T>C	-			1					-4			-3	Likely benign		reviewed_by_expert_panel	Likely_benign	-
NM_000059.4:c.7598C>G	NP_000050.3:p.Ser2533Cys				-4	-1	-2					-7	Benign		criteria_provided,_conflicting_classifications	Conflicting_classifications_of_pathogenicity	Uncertain_significance(4)|Likely_benign(2)
NM_000059.4:c.7759C>T	NP_000050.3:p.Leu2587Phe			-1	-4	-1	-8					-14	Benign		criteria_provided,_conflicting_classifications	Conflicting_classifications_of_pathogenicity	Likely_pathogenic(1)|Uncertain_significance(6)|Benign(1)|Likely_benign(5)
NM_000059.4:c.8331+147C>T	-			1		-1		-1				-1	Likely benign		-	-	-
NM_000059.4:c.8331+154dupA	-					-1		-1				-2	Likely benign		-	-	-
NM_000059.4:c.8332-154T>C	-			-4		-1		-1				-6	Likely benign		-	-	-
NM_000059.4:c.8488-10A>G	-			-1		-1						-2	Likely benign		criteria_provided,_conflicting_classifications	Conflicting_classifications_of_pathogenicity	Uncertain_significance(2)|Likely_benign(2)
NM_000059.4:c.8953+80G>A	-			-4		-1		-1				-6	Likely benign		criteria_provided,_single_submitter	Uncertain_significance	-
NM_000059.4:c.9205T>C	NP_000050.3:p.Cys3069Arg				-4	-1						-5	Likely benign		criteria_provided,_conflicting_classifications	Conflicting_classifications_of_pathogenicity	Uncertain_significance(3)|Likely_benign(1)
NM_000059.4:c.9271G>A	NP_000050.3:p.Val3091Ile				-4	-1						-5	Likely benign		criteria_provided,_conflicting_classifications	Conflicting_classifications_of_pathogenicity	Uncertain_significance(5)|Benign(1)|Likely_benign(3)
NM_000059.4:c.9344A>G	NP_000050.3:p.Lys3115Arg			-4		-1	-1					-6	Likely benign		criteria_provided,_conflicting_classifications	Conflicting_classifications_of_pathogenicity	Uncertain_significance(8)|Likely_benign(1)
NM_000059.4:c.9911G>A	NP_000050.3:p.Cys3304Tyr			1						-4		-3	Likely benign		criteria_provided,_multiple_submitters,_no_conflicts	Uncertain_significance	-
NM_000059.4:c.10120A>G	NP_000050.3:p.Thr3374Ala						-1			-4		-5	Likely benign		criteria_provided,_conflicting_classifications	Conflicting_classifications_of_pathogenicity	Uncertain_significance(3)|Likely_benign(4)
NM_000059.4:c.377A>G	NP_000050.3:p.Gln126Arg			1						-4		-3	Likely benign		criteria_provided,_multiple_submitters,_no_conflicts	Uncertain_significance	-
NM_000059.4:c.1441A>G	NP_000050.3:p.Ile481Val									-4		-4	Likely benign		criteria_provided,_conflicting_classifications	Conflicting_classifications_of_pathogenicity	Uncertain_significance(5)|Benign(1)|Likely_benign(2)
NM_000059.4:c.1769T>G	NP_000050.3:p.Phe590Cys				-4		-1			-4		-9	Benign		criteria_provided,_conflicting_classifications	Conflicting_classifications_of_pathogenicity	Uncertain_significance(5)|Likely_benign(5)
NM_000059.4:c.2194G>C	NP_000050.3:p.Glu732Gln									-4		-4	Likely benign		criteria_provided,_conflicting_classifications	Conflicting_classifications_of_pathogenicity	Uncertain_significance(4)|Likely_benign(1)
NM_000059.4:c.3437A>G	NP_000050.3:p.Glu1146Gly			1			1			-4		-2	Likely benign		criteria_provided,_conflicting_classifications	Conflicting_classifications_of_pathogenicity	Uncertain_significance(6)|Likely_benign(1)
NM_000059.4:c.9839C>A	NP_000050.3:p.Pro3280His									-4		-4	Likely benign		criteria_provided,_conflicting_classifications	Conflicting_classifications_of_pathogenicity	Uncertain_significance(7)|Likely_benign(2)
NM_000059.4:c.8351G>A	NP_000050.3:p.Arg2784Gln				4	1	-8					-3	Likely benign	Suspected reduced penetrance	criteria_provided,_conflicting_classifications	Conflicting_classifications_of_pathogenicity	Pathogenic(1)|Likely_pathogenic(5)|Uncertain_significance(9)
NM_000059.4:c.1744A>G	NP_000050.3:p.Thr582Ala			1						-4		-3	Likely benign		criteria_provided,_conflicting_classifications	Conflicting_classifications_of_pathogenicity	Uncertain_significance(5)|Benign(1)|Likely_benign(2)
NM_000059.4:c.2195A>C	NP_000050.3:p.Glu732Ala									-4		-4	Likely benign		criteria_provided,_conflicting_classifications	Conflicting_classifications_of_pathogenicity	Uncertain_significance(1)|Likely_benign(1)
NM_000059.4:c.2444T>C	NP_000050.3:p.Met815Thr									-4		-4	Likely benign		criteria_provided,_conflicting_classifications	Conflicting_classifications_of_pathogenicity	Uncertain_significance(6)|Likely_benign(1)
NM_000059.4:c.2608A>G	NP_000050.3:p.Ile870Val									-4		-4	Likely benign		criteria_provided,_conflicting_classifications	Conflicting_classifications_of_pathogenicity	Uncertain_significance(1)|Likely_benign(1)
NM_000059.4:c.3226G>A	NP_000050.3:p.Val1076Ile									-4		-4	Likely benign		criteria_provided,_conflicting_classifications	Conflicting_classifications_of_pathogenicity	Uncertain_significance(10)|Likely_benign(1)
NM_000059.4:c.3344C>G	NP_000050.3:p.Ser1115Cys									-4		-4	Likely benign		criteria_provided,_conflicting_classifications	Conflicting_classifications_of_pathogenicity	Uncertain_significance(5)|Likely_benign(1)
NM_000059.4:c.3539A>G	NP_000050.3:p.Lys1180Arg			-1						-4		-5	Likely benign		criteria_provided,_conflicting_classifications	Conflicting_classifications_of_pathogenicity	Uncertain_significance(7)|Benign(1)|Likely_benign(3)
NM_000059.4:c.3901A>C	NP_000050.3:p.Thr1301Pro			1						-4		-3	Likely benign		-	-	-
NM_000059.4:c.4261T>C	NP_000050.3:p.Phe1421Leu			1						-4		-3	Likely benign		criteria_provided,_conflicting_classifications	Conflicting_classifications_of_pathogenicity	Uncertain_significance(2)|Likely_benign(1)
NM_000059.4:c.4372C>T	NP_000050.3:p.His1458Tyr			-4			1			-4		-7	Benign		criteria_provided,_conflicting_classifications	Conflicting_classifications_of_pathogenicity	Uncertain_significance(4)|Likely_benign(3)
NM_000059.4:c.4567G>C	NP_000050.3:p.Gly1523Arg									-4		-4	Likely benign		criteria_provided,_conflicting_classifications	Conflicting_classifications_of_pathogenicity	Uncertain_significance(6)|Likely_benign(1)
NM_000059.4:c.4685A>C	NP_000050.3:p.Gln1562Pro			-1						-4		-5	Likely benign		criteria_provided,_conflicting_classifications	Conflicting_classifications_of_pathogenicity	Uncertain_significance(4)|Likely_benign(1)
NM_000059.4:c.5134G>A	NP_000050.3:p.Gly1712Arg			1						-4		-3	Likely benign		-	-	-
NM_000059.4:c.5191C>A	NP_000050.3:p.His1731Asn									-4		-4	Likely benign		criteria_provided,_conflicting_classifications	Conflicting_classifications_of_pathogenicity	Uncertain_significance(3)|Likely_benign(5)
NM_000059.4:c.5635G>A	NP_000050.3:p.Glu1879Lys			-4			-2			-4		-10	Benign		criteria_provided,_conflicting_classifications	Conflicting_classifications_of_pathogenicity	Uncertain_significance(1)|Benign(5)|Likely_benign(9)
NM_000059.4:c.5737T>C	NP_000050.3:p.Cys1913Arg			-1						-4		-5	Likely benign		criteria_provided,_conflicting_classifications	Conflicting_classifications_of_pathogenicity	Uncertain_significance(3)|Benign(1)|Likely_benign(5)
NM_000059.4:c.6580A>G	NP_000050.3:p.Ile2194Val			1						-4		-3	Likely benign		criteria_provided,_conflicting_classifications	Conflicting_classifications_of_pathogenicity	Uncertain_significance(1)|Likely_benign(1)
NM_000059.4:c.7088A>G	NP_000050.3:p.Tyr2363Cys						-1			-4		-5	Likely benign		criteria_provided,_multiple_submitters,_no_conflicts	Uncertain_significance	-
NM_000059.4:c.7435+10G>A	-					-1	-2		-4			-7	Benign		criteria_provided,_conflicting_classifications	Conflicting_classifications_of_pathogenicity	Uncertain_significance(2)|Benign(2)|Likely_benign(3)
NM_000059.4:c.7744G>A	NP_000050.3:p.Ala2582Thr			1	-4							-3	Likely benign		criteria_provided,_conflicting_classifications	Conflicting_classifications_of_pathogenicity	Uncertain_significance(1)|Likely_benign(1)
NM_000059.4:c.8090G>A	NP_000050.3:p.Ser2697Asn			-4	-4	-1	-4					-13	Benign		criteria_provided,_conflicting_classifications	Conflicting_classifications_of_pathogenicity	Uncertain_significance(3)|Benign(4)|Likely_benign(5)
NM_000059.4:c.8417C>T	NP_000050.3:p.Ser2806Leu			-8	-4		-2					-14	Benign		criteria_provided,_conflicting_classifications	Conflicting_classifications_of_pathogenicity	Uncertain_significance(5)|Likely_benign(5)
NM_000059.4:c.8593T>G	NP_000050.3:p.Leu2865Val			1	-4	-1						-4	Likely benign		criteria_provided,_conflicting_classifications	Conflicting_classifications_of_pathogenicity	Uncertain_significance(2)|Likely_benign(2)
NM_000059.4:c.8953+13A>G	-			1		-1			-4			-4	Likely benign		-	-	-
NM_000059.4:c.9275A>G	NP_000050.3:p.Tyr3092Cys			-1	-4	1	-8		-4			-16	Benign		criteria_provided,_conflicting_classifications	Conflicting_classifications_of_pathogenicity	Uncertain_significance(2)|Benign(1)|Likely_benign(9)
NM_000059.4:c.9640A>G	NP_000050.3:p.Lys3214Glu			1						-4		-3	Likely benign		criteria_provided,_multiple_submitters,_no_conflicts	Uncertain_significance	-
NM_000059.4:c.9652T>C	NP_000050.3:p.Ser3218Pro			1						-4		-3	Likely benign		-	-	-
NM_000059.4:c.165_167del	NP_000050.3:p.Asn56del				-4					-4		-8	Benign		-	-	-
NM_000059.4:c.343A>G	NP_000050.3:p.Lys115Glu						-4			-4		-8	Benign		criteria_provided,_conflicting_classifications	Conflicting_classifications_of_pathogenicity	Uncertain_significance(7)|Likely_benign(1)
NM_000059.4:c.433_435del	NP_000050.3:p.Val145del			-1			-4		-4	-4		-13	Benign		-	-	-
NM_000059.4:c.752C>G	NP_000050.3:p.Thr251Arg								-4	-4		-8	Benign		criteria_provided,_conflicting_classifications	Conflicting_classifications_of_pathogenicity	Uncertain_significance(6)|Likely_benign(1)
NM_000059.4:c.1319T>G	NP_000050.3:p.Leu440Arg			1						-4		-3	Likely benign		criteria_provided,_conflicting_classifications	Conflicting_classifications_of_pathogenicity	Uncertain_significance(2)|Likely_benign(1)
NM_000059.4:c.2299A>C	NP_000050.3:p.Ser767Arg			-1						-4		-5	Likely benign		criteria_provided,_conflicting_classifications	Conflicting_classifications_of_pathogenicity	Uncertain_significance(5)|Likely_benign(2)
NM_000059.4:c.2892A>T	NP_000050.3:p.Lys964Asn			-4						-4		-8	Benign		criteria_provided,_conflicting_classifications	Conflicting_classifications_of_pathogenicity	Uncertain_significance(2)|Likely_benign(6)
NM_000059.4:c.3007C>G	NP_000050.3:p.His1003Asp									-4		-4	Likely benign		criteria_provided,_conflicting_classifications	Conflicting_classifications_of_pathogenicity	Uncertain_significance(5)|Likely_benign(1)
NM_000059.4:c.3032C>G	NP_000050.3:p.Thr1011Arg			-1			1		-4	-4		-8	Benign		criteria_provided,_conflicting_classifications	Conflicting_classifications_of_pathogenicity	Uncertain_significance(9)|Likely_benign(4)
NM_000059.4:c.3073A>G	NP_000050.3:p.Lys1025Glu			-1					-4	-4		-9	Benign		criteria_provided,_conflicting_classifications	Conflicting_classifications_of_pathogenicity	Uncertain_significance(4)|Benign(1)|Likely_benign(7)
NM_000059.4:c.3329A>G	NP_000050.3:p.Glu1110Gly									-4		-4	Likely benign		criteria_provided,_conflicting_classifications	Conflicting_classifications_of_pathogenicity	Uncertain_significance(3)|Likely_benign(1)
NM_000059.4:c.3863A>G	NP_000050.3:p.Asn1288Ser			-1						-4		-5	Likely benign		criteria_provided,_conflicting_classifications	Conflicting_classifications_of_pathogenicity	Uncertain_significance(3)|Likely_benign(1)
NM_000059.4:c.4258G>C	NP_000050.3:p.Asp1420His			1						-4		-3	Likely benign		-	-	-
NM_000059.4:c.5668A>G	NP_000050.3:p.Met1890Val									-4		-4	Likely benign		criteria_provided,_conflicting_classifications	Conflicting_classifications_of_pathogenicity	Uncertain_significance(4)|Likely_benign(2)
NM_000059.4:c.5714A>T	NP_000050.3:p.His1905Leu			1						-4		-3	Likely benign		criteria_provided,_conflicting_classifications	Conflicting_classifications_of_pathogenicity	Uncertain_significance(4)|Likely_benign(1)
NM_000059.4:c.6317T>C	NP_000050.3:p.Leu2106Pro			-4	-4		-1			-4		-13	Benign		criteria_provided,_conflicting_classifications	Conflicting_classifications_of_pathogenicity	Uncertain_significance(3)|Benign(1)|Likely_benign(11)
NM_000059.4:c.6698C>A	NP_000050.3:p.Ala2233Asp						-4			-4		-8	Benign		criteria_provided,_conflicting_classifications	Conflicting_classifications_of_pathogenicity	Uncertain_significance(5)|Likely_benign(3)
NM_000059.4:c.7093C>T	NP_000050.3:p.His2365Tyr			-1						-4		-5	Likely benign		criteria_provided,_multiple_submitters,_no_conflicts	Uncertain_significance	-
NM_000059.4:c.7417T>C	NP_000050.3:p.Cys2473Arg			1						-4		-3	Likely benign		criteria_provided,_conflicting_classifications	Conflicting_classifications_of_pathogenicity	Uncertain_significance(2)|Likely_benign(1)
NM_000059.4:c.9581C>A	NP_000050.3:p.Pro3194Gln						-4			-4		-8	Benign		criteria_provided,_conflicting_classifications	Conflicting_classifications_of_pathogenicity	Uncertain_significance(2)|Benign(1)|Likely_benign(4)
NM_000059.4:c.9632C>A	NP_000050.3:p.Thr3211Lys			1			-1			-4		-4	Likely benign		criteria_provided,_conflicting_classifications	Conflicting_classifications_of_pathogenicity	Uncertain_significance(4)|Likely_benign(1)
NM_000059.4:c.9691T>C	NP_000050.3:p.Ser3231Pro			1						-4		-3	Likely benign		criteria_provided,_multiple_submitters,_no_conflicts	Uncertain_significance	-
NM_000059.4:c.9838C>T	NP_000050.3:p.Pro3280Ser				-4		-2			-4		-10	Benign		criteria_provided,_conflicting_classifications	Conflicting_classifications_of_pathogenicity	Uncertain_significance(2)|Likely_benign(3)
NM_000059.4:c.619A>G	NP_000050.3:p.Thr207Ala						-2		-4	-4		-10	Benign		criteria_provided,_multiple_submitters,_no_conflicts	Uncertain_significance	-
NM_000059.4:c.2848G>A	NP_000050.3:p.Val950Ile			-4			-1			-4		-9	Benign		criteria_provided,_conflicting_classifications	Conflicting_classifications_of_pathogenicity	Uncertain_significance(8)|Likely_benign(1)
NM_000059.4:c.3595G>A	NP_000050.3:p.Asp1199Asn			1						-4		-3	Likely benign		criteria_provided,_conflicting_classifications	Conflicting_classifications_of_pathogenicity	Uncertain_significance(4)|Likely_benign(2)
NM_000059.4:c.5229_5231del	NP_000050.3:p.Ser1744del									-4		-4	Likely benign		-	-	-
NM_000059.4:c.6148G>A	NP_000050.3:p.Val2050Ile			1						-4		-3	Likely benign		criteria_provided,_conflicting_classifications	Conflicting_classifications_of_pathogenicity	Uncertain_significance(7)|Likely_benign(1)
NM_000059.4:c.7055C>T	NP_000050.3:p.Pro2352Leu									-4		-4	Likely benign		criteria_provided,_multiple_submitters,_no_conflicts	Uncertain_significance	-
NM_000059.4:c.7096C>G	NP_000050.3:p.Leu2366Val									-4		-4	Likely benign		criteria_provided,_conflicting_classifications	Conflicting_classifications_of_pathogenicity	Uncertain_significance(2)|Likely_benign(5)
NM_000059.4:c.56G>T	NP_000050.3:p.Cys19Phe			-1		-1						-2	Likely benign		criteria_provided,_single_submitter	Uncertain_significance	-
NM_000059.4:c.891_902del	NP_000050.3:p.Glu297_Val300del									-4		-4	Likely benign		-	-	-
NM_000059.4:c.905C>G	NP_000050.3:p.Thr302Ser			-1						-4		-5	Likely benign		criteria_provided,_conflicting_classifications	Conflicting_classifications_of_pathogenicity	Uncertain_significance(6)|Likely_benign(1)
NM_000059.4:c.1012G>A	NP_000050.3:p.Ala338Thr			-1			-4			-4		-9	Benign		criteria_provided,_conflicting_classifications	Conflicting_classifications_of_pathogenicity	Uncertain_significance(11)|Likely_benign(2)
NM_000059.4:c.1265A>C	NP_000050.3:p.Asn422Thr			1						-4		-3	Likely benign		criteria_provided,_conflicting_classifications	Conflicting_classifications_of_pathogenicity	Uncertain_significance(2)|Likely_benign(1)
NM_000059.4:c.2661G>C	NP_000050.3:p.Glu887Asp			1						-4		-3	Likely benign		criteria_provided,_conflicting_classifications	Conflicting_classifications_of_pathogenicity	Uncertain_significance(2)|Likely_benign(1)
NM_000059.4:c.2987T>A	NP_000050.3:p.Leu996His			1						-4		-3	Likely benign		-	-	-
NM_000059.4:c.3317G>A	NP_000050.3:p.Ser1106Asn			1						-4		-3	Likely benign		criteria_provided,_conflicting_classifications	Conflicting_classifications_of_pathogenicity	Uncertain_significance(1)|Likely_benign(1)
NM_000059.4:c.3453C>G	NP_000050.3:p.Ile1151Met									-4		-4	Likely benign		criteria_provided,_conflicting_classifications	Conflicting_classifications_of_pathogenicity	Uncertain_significance(4)|Likely_benign(5)
NM_000059.4:c.3836A>G	NP_000050.3:p.Asn1279Ser			1						-4		-3	Likely benign		criteria_provided,_conflicting_classifications	Conflicting_classifications_of_pathogenicity	Uncertain_significance(5)|Likely_benign(1)
NM_000059.4:c.4117_4149del	NP_000050.3:p.Met1373_Asp1383del									-4		-4	Likely benign		#N/A	#N/A	#N/A
NM_000059.4:c.4287G>T	NP_000050.3:p.Gln1429His			1						-4		-3	Likely benign		criteria_provided,_conflicting_classifications	Conflicting_classifications_of_pathogenicity	Uncertain_significance(2)|Likely_benign(1)
NM_000059.4:c.4436G>C	NP_000050.3:p.Ser1479Thr				-4					-4		-8	Benign		criteria_provided,_conflicting_classifications	Conflicting_classifications_of_pathogenicity	Uncertain_significance(3)|Likely_benign(5)
NM_000059.4:c.4919A>C	NP_000050.3:p.His1640Pro			1						-4		-3	Likely benign		criteria_provided,_conflicting_classifications	Conflicting_classifications_of_pathogenicity	Uncertain_significance(3)|Likely_benign(1)
NM_000059.4:c.5218_5223del	NP_000050.3:p.Leu1740_Ser1741del			-4						-4		-8	Benign		-	-	-
NM_000059.4:c.5390C>G	NP_000050.3:p.Ala1797Gly									-4		-4	Likely benign		criteria_provided,_conflicting_classifications	Conflicting_classifications_of_pathogenicity	Uncertain_significance(6)|Likely_benign(2)
NM_000059.4:c.5846A>T	NP_000050.3:p.Asp1949Val			1						-4		-3	Likely benign		criteria_provided,_conflicting_classifications	Conflicting_classifications_of_pathogenicity	Uncertain_significance(1)|Likely_benign(1)
NM_000059.4:c.6458C>T	NP_000050.3:p.Pro2153Leu									-4		-4	Likely benign		criteria_provided,_conflicting_classifications	Conflicting_classifications_of_pathogenicity	Uncertain_significance(7)|Likely_benign(2)
NM_000059.4:c.6966G>T	NP_000050.3:p.Met2322Ile									-4		-4	Likely benign		criteria_provided,_multiple_submitters,_no_conflicts	Uncertain_significance	-
NM_000059.4:c.8350C>T	NP_000050.3:p.Arg2784Trp				4		4					8	Likely pathogenic		criteria_provided,_conflicting_classifications	Conflicting_classifications_of_pathogenicity	Pathogenic(3)|Likely_pathogenic(15)|Uncertain_significance(1)
NM_000059.4:c.9501+4A>G	-					-1	-4		-4			-9	Benign		criteria_provided,_conflicting_classifications	Conflicting_classifications_of_pathogenicity	Uncertain_significance(1)|Likely_benign(6)
NM_000059.4:c.9547A>G	NP_000050.3:p.Ile3183Val				-4	-1						-5	Likely benign		criteria_provided,_conflicting_classifications	Conflicting_classifications_of_pathogenicity	Uncertain_significance(1)|Benign(2)|Likely_benign(2)
NM_000059.4:c.9651G>A	NP_000050.3:p.Met3217Ile			1						-4		-3	Likely benign		criteria_provided,_conflicting_classifications	Conflicting_classifications_of_pathogenicity	Uncertain_significance(3)|Likely_benign(1)
NM_000059.4:c.9671T>C	NP_000050.3:p.Ile3224Thr			1						-4		-3	Likely benign		criteria_provided,_multiple_submitters,_no_conflicts	Uncertain_significance	-
NM_000059.4:c.9792C>A	NP_000050.3:p.Asn3264Lys			1						-4		-3	Likely benign		criteria_provided,_single_submitter	Uncertain_significance	-
NM_000059.4:c.1480G>A	NP_000050.3:p.Val494Met			1					-4	-4		-7	Benign		criteria_provided,_conflicting_classifications	Conflicting_classifications_of_pathogenicity	Uncertain_significance(3)|Likely_benign(1)
NM_000059.4:c.1966A>G	NP_000050.3:p.Thr656Ala						-1			-4		-5	Likely benign		criteria_provided,_conflicting_classifications	Conflicting_classifications_of_pathogenicity	Uncertain_significance(6)|Likely_benign(1)
NM_000059.4:c.2280A>C	NP_000050.3:p.Leu760Phe			1						-4		-3	Likely benign		criteria_provided,_conflicting_classifications	Conflicting_classifications_of_pathogenicity	Uncertain_significance(2)|Likely_benign(1)
NM_000059.4:c.2793A>T	NP_000050.2:p.Gly931=			1						-4		-3	Likely benign		criteria_provided,_single_submitter	Likely_benign	-
NM_000059.4:c.7344G>A	NP_000050.2:p.Lys2448=			1						-4		-3	Likely benign		criteria_provided,_single_submitter	Likely_benign	-
NM_000059.4:c.-39-36C>G	-			-4		-1		-1				-6	Likely benign		criteria_provided,_single_submitter	Likely_benign	-
NM_000059.4:c.475+26T>C	-					-1			-4			-5	Likely benign		criteria_provided,_single_submitter	Likely_benign	-
NM_000059.4:c.9192C>T	NP_000050.2:p.Asp3064=			1		-1		-1				-1	Likely benign		criteria_provided,_multiple_submitters,_no_conflicts	Likely_benign	-
NM_000059.4:c.1116T>C	NP_000050.2:p.Asn372=			1						-4		-3	Likely benign		criteria_provided,_single_submitter	Likely_benign	-
NM_000059.4:c.4563A>T	NP_000050.2:p.Leu1521=			1						-4		-3	Likely benign		criteria_provided,_multiple_submitters,_no_conflicts	Likely_benign	-
*Please check ClinVar for the most up-to-date classification

## Sheet: PALB2
Supplementary Table 1c. Suggested clinically-relevant classifications from application of PALB2-specific ACMG/AMP criteria v1.1.0 and points system for variants with single or multiple conflicting submissions, Uncertain, or absent in ClinVar (as at 1 September 2022), with details on updated ClinVar classification (as at 27 January 2024)*
HGVSc	HGVSp	PVS1	Population data (BA1, BS1, PM2)	In silico predictions (PP3, BP4)	BP7	BP1	Total points	Our suggested classification	Caveats	Updated ClinVar review status (as at 27 Jan 2024)	Updated ClinVar classification (as at 27 Jan 2024)	Updated ClinVar conflicting submissions (as at 27 Jan 2024)
NM_024675.4:c.1189A>T	NP_078951.2:p.Thr397Ser			-1		-1	-2	Likely benign		criteria_provided,_conflicting_classifications	Conflicting_classifications_of_pathogenicity	Uncertain_significance(11)|Likely_benign(2)
NM_024675.4:c.3518C>T	NP_078951.2:p.Ala1173Val			-1	-4	-1	-6	Likely benign		criteria_provided,_multiple_submitters,_no_conflicts	Uncertain_significance	-
NM_024675.4:c.3508C>T	NP_078951.2:p.His1170Tyr			-1		-1	-2	Likely benign		criteria_provided,_conflicting_classifications	Conflicting_classifications_of_pathogenicity	Uncertain_significance(10)|Benign(1)|Likely_benign(5)
NM_024675.4:c.3433G>A	NP_078951.2:p.Gly1145Ser			-1		-1	-2	Likely benign		criteria_provided,_multiple_submitters,_no_conflicts	Uncertain_significance	-
NM_024675.4:c.3307G>C	NP_078951.2:p.Val1103Leu			-1		-1	-2	Likely benign		criteria_provided,_conflicting_classifications	Conflicting_classifications_of_pathogenicity	Uncertain_significance(9)|Benign(1)|Likely_benign(1)
NM_024675.4:c.3209T>C	NP_078951.2:p.Leu1070Pro		1	-1		-1	-1	Likely benign		criteria_provided,_multiple_submitters,_no_conflicts	Uncertain_significance	-
NM_024675.4:c.3054G>C	NP_078951.2:p.Glu1018Asp		-8	-1		-1	-10	Benign		reviewed_by_expert_panel	Benign	-
NM_024675.4:c.2869A>C	NP_078951.2:p.Lys957Gln			-1		-1	-2	Likely benign		criteria_provided,_multiple_submitters,_no_conflicts	Uncertain_significance	-
NM_024675.4:c.2474G>C	NP_078951.2:p.Arg825Thr		-4	-1		-1	-6	Likely benign		criteria_provided,_conflicting_classifications	Conflicting_classifications_of_pathogenicity	Uncertain_significance(3)|Likely_benign(8)
NM_024675.4:c.2289G>C	NP_078951.2:p.Leu763Phe		-4	-1		-1	-6	Likely benign		criteria_provided,_conflicting_classifications	Conflicting_classifications_of_pathogenicity	Uncertain_significance(7)|Benign(2)|Likely_benign(5)
NM_024675.4:c.2270C>T	NP_078951.2:p.Thr757Ile		1	-1		-1	-1	Likely benign		criteria_provided,_multiple_submitters,_no_conflicts	Uncertain_significance	-
NM_024675.4:c.2239T>C	NP_078951.2:p.Ser747Pro			-1		-1	-2	Likely benign		criteria_provided,_multiple_submitters,_no_conflicts	Uncertain_significance	-
NM_024675.4:c.2200A>T	NP_078951.2:p.Thr734Ser		-4	-1		-1	-6	Likely benign		criteria_provided,_conflicting_classifications	Conflicting_classifications_of_pathogenicity	Uncertain_significance(9)|Likely_benign(2)
NM_024675.4:c.1958G>T	NP_078951.2:p.Cys653Phe		1	-1		-1	-1	Likely benign		criteria_provided,_multiple_submitters,_no_conflicts	Uncertain_significance	-
NM_024675.4:c.1659C>A	NP_078951.2:p.His553Gln			-1		-1	-2	Likely benign		criteria_provided,_conflicting_classifications	Conflicting_classifications_of_pathogenicity	Uncertain_significance(3)|Likely_benign(1)
NM_024675.4:c.1655A>G	NP_078951.2:p.Gln552Arg			-1		-1	-2	Likely benign		criteria_provided,_multiple_submitters,_no_conflicts	Uncertain_significance	-
NM_024675.4:c.1610C>T	NP_078951.2:p.Ser537Leu			-1		-1	-2	Likely benign		criteria_provided,_conflicting_classifications	Conflicting_classifications_of_pathogenicity	Uncertain_significance(8)|Likely_benign(1)
NM_024675.4:c.1099G>A	NP_078951.2:p.Glu367Lys		1	-1		-1	-1	Likely benign		criteria_provided,_single_submitter	Uncertain_significance	-
NM_024675.4:c.740C>G	NP_078951.2:p.Thr247Arg			-1		-1	-2	Likely benign		criteria_provided,_multiple_submitters,_no_conflicts	Uncertain_significance	-
NM_024675.4:c.656A>G	NP_078951.2:p.Asp219Gly		-4	-1		-1	-6	Likely benign		criteria_provided,_conflicting_classifications	Conflicting_classifications_of_pathogenicity	Uncertain_significance(7)|Likely_benign(5)
NM_024675.4:c.232G>A	NP_078951.2:p.Val78Ile		-4	-1		-1	-6	Likely benign		criteria_provided,_conflicting_classifications	Conflicting_classifications_of_pathogenicity	Uncertain_significance(3)|Likely_benign(11)
NM_024675.4:c.113C>G	NP_078951.2:p.Ala38Gly			-1		-1	-2	Likely benign		criteria_provided,_multiple_submitters,_no_conflicts	Uncertain_significance	-
NM_024675.4:c.110G>A	NP_078951.2:p.Arg37His			-1	-4	-1	-6	Likely benign		criteria_provided,_conflicting_classifications	Conflicting_classifications_of_pathogenicity	Uncertain_significance(10)|Likely_benign(1)
NM_024675.4:c.100C>T	NP_078951.2:p.Arg34Cys			-1		-1	-2	Likely benign		criteria_provided,_conflicting_classifications	Conflicting_classifications_of_pathogenicity	Uncertain_significance(10)|Likely_benign(1)
NM_024675.4:c.3350+11A>G	-			-1	-1		-2	Likely benign		criteria_provided,_conflicting_classifications	Conflicting_classifications_of_pathogenicity	Uncertain_significance(1)|Likely_benign(3)
NM_024675.4:c.2971G>T	NP_078951.2:p.Val991Phe			-1		-1	-2	Likely benign		criteria_provided,_multiple_submitters,_no_conflicts	Uncertain_significance	-
NM_024675.4:c.2834+22A>C	-			-1	-1		-2	Likely benign		-	-	-
NM_024675.4:c.2816T>G	NP_078951.2:p.Leu939Trp		-8	-1		-1	-10	Benign		criteria_provided,_conflicting_classifications	Conflicting_classifications_of_pathogenicity	Uncertain_significance(3)|Benign(6)|Likely_benign(15)
NM_024675.4:c.2547C>T	NP_078951.2:p.Ser849=		1	-1	-1		-1	Likely benign		-	-	-
NM_024675.4:c.1010T>C	NP_078951.2:p.Leu337Ser		-8	-1		-1	-10	Benign		criteria_provided,_conflicting_classifications	Conflicting_classifications_of_pathogenicity	Uncertain_significance(1)|Benign(15)|Likely_benign(2)
NM_024675.4:c.998C>A	NP_078951.2:p.Thr333Asn		1	-1		-1	-1	Likely benign		criteria_provided,_multiple_submitters,_no_conflicts	Uncertain_significance	-
NM_024675.4:c.693A>T	NP_078951.2:p.Lys231Asn		1	-1		-1	-1	Likely benign		criteria_provided,_multiple_submitters,_no_conflicts	Uncertain_significance	-
NM_024675.4:c.315G>C	NP_078951.2:p.Glu105Asp			-1		-1	-2	Likely benign		criteria_provided,_conflicting_classifications	Conflicting_classifications_of_pathogenicity	Uncertain_significance(9)|Likely_benign(1)
NM_024675.4:c.3367G>A	NP_078951.2:p.Val1123Met			-1		-1	-2	Likely benign		criteria_provided,_multiple_submitters,_no_conflicts	Uncertain_significance	-
NM_024675.4:c.3306C>G	NP_078951.2:p.Ser1102Arg	8				-1	7	Likely pathogenic	8 points assigned to PVS1 based on studies that have shown this missense change is associated with skipping of exon 12 (PMID: 30890586; Invitae) - Expert Panel curation advised.	criteria_provided,_multiple_submitters,_no_conflicts	Uncertain_significance	-
NM_024675.4:c.3278T>C	NP_078951.2:p.Ile1093Thr			-1		-1	-2	Likely benign		criteria_provided,_conflicting_classifications	Conflicting_classifications_of_pathogenicity	Uncertain_significance(6)|Likely_benign(1)
NM_024675.4:c.3047T>C	NP_078951.2:p.Phe1016Ser		1	-1		-1	-1	Likely benign		criteria_provided,_multiple_submitters,_no_conflicts	Uncertain_significance	-
NM_024675.4:c.2755G>A	NP_078951.2:p.Val919Ile			-1		-1	-2	Likely benign		criteria_provided,_multiple_submitters,_no_conflicts	Uncertain_significance	-
NM_024675.4:c.2333G>C	NP_078951.2:p.Ser778Thr		1	-1		-1	-1	Likely benign		-	-	-
NM_024675.4:c.1870C>T	NP_078951.2:p.Leu624Phe		1	-1		-1	-1	Likely benign		criteria_provided,_multiple_submitters,_no_conflicts	Uncertain_significance	-
NM_024675.4:c.1223A>G	NP_078951.2:p.Tyr408Cys			-1		-1	-2	Likely benign		criteria_provided,_single_submitter	Uncertain_significance	-
NM_024675.4:c.689A>G	NP_078951.2:p.Glu230Gly		1	-1		-1	-1	Likely benign		criteria_provided,_single_submitter	Uncertain_significance	-
NM_024675.4:c.298C>T	NP_078951.2:p.Leu100Phe		-4	-1		-1	-6	Likely benign		criteria_provided,_conflicting_classifications	Conflicting_classifications_of_pathogenicity	Uncertain_significance(6)|Likely_benign(5)
NM_024675.4:c.2792T>G	NP_078951.2:p.Leu931Arg			-1		-1	-2	Likely benign		criteria_provided,_conflicting_classifications	Conflicting_classifications_of_pathogenicity	Uncertain_significance(9)|Likely_benign(1)
NM_024675.4:c.344G>T	NP_078951.2:p.Gly115Val		-4	-1		-1	-6	Likely benign		criteria_provided,_conflicting_classifications	Conflicting_classifications_of_pathogenicity	Uncertain_significance(2)|Benign(1)|Likely_benign(9)
NM_024675.4:c.1001A>G	NP_078951.2:p.Tyr334Cys			-1		-1	-2	Likely benign		criteria_provided,_conflicting_classifications	Conflicting_classifications_of_pathogenicity	Uncertain_significance(6)|Benign(2)|Likely_benign(6)
NM_024675.4:c.560C>A	NP_078951.2:p.Pro187His		-4	-1		-1	-6	Likely benign		criteria_provided,_conflicting_classifications	Conflicting_classifications_of_pathogenicity	Uncertain_significance(7)|Likely_benign(2)
NM_024675.4:c.82T>A	NP_078951.2:p.Tyr28Asn		1	-1		-1	-1	Likely benign		reviewed_by_expert_panel	Uncertain_significance	-
NM_024675.4:c.2486A>G	NP_078951.2:p.Gln829Arg		1	-1		-1	-1	Likely benign		-	-	-
NM_024675.4:c.2230G>A	NP_078951.2:p.Glu744Lys		-4	-1		-1	-6	Likely benign		criteria_provided,_conflicting_classifications	Conflicting_classifications_of_pathogenicity	Uncertain_significance(6)|Likely_benign(1)
NM_024675.4:c.1544A>G	NP_078951.2:p.Lys515Arg			-1		-1	-2	Likely benign		criteria_provided,_conflicting_classifications	Conflicting_classifications_of_pathogenicity	Uncertain_significance(9)|Likely_benign(5)
NM_024675.4:c.928A>G	NP_078951.2:p.Ser310Gly		-4	-1		-1	-6	Likely benign		criteria_provided,_conflicting_classifications	Conflicting_classifications_of_pathogenicity	Uncertain_significance(7)|Benign(1)|Likely_benign(2)
NM_024675.4:c.846A>T	NP_078951.2:p.Arg282Ser		1	-1		-1	-1	Likely benign		criteria_provided,_conflicting_classifications	Conflicting_classifications_of_pathogenicity	Uncertain_significance(1)|Likely_benign(1)
NM_024675.4:c.3296C>T	NP_078951.2:p.Thr1099Met			-1		-1	-2	Likely benign		criteria_provided,_multiple_submitters,_no_conflicts	Uncertain_significance	-
NM_024675.4:c.3059A>G	NP_078951.2:p.Gln1020Arg			-1		-1	-2	Likely benign		criteria_provided,_multiple_submitters,_no_conflicts	Uncertain_significance	-
NM_024675.4:c.2851T>C	NP_078951.2:p.Ser951Pro		-8	-1		-1	-10	Benign		criteria_provided,_conflicting_classifications	Conflicting_classifications_of_pathogenicity	Uncertain_significance(4)|Benign(3)|Likely_benign(8)
NM_024675.4:c.2763G>C	NP_078951.2:p.Gln921His		1	-1		-1	-1	Likely benign		criteria_provided,_single_submitter	Uncertain_significance	-
NM_024675.4:c.2619T>G	NP_078951.2:p.Ser873Arg			-1		-1	-2	Likely benign		criteria_provided,_conflicting_classifications	Conflicting_classifications_of_pathogenicity	Uncertain_significance(8)|Likely_benign(1)
NM_024675.4:c.2549T>A	NP_078951.2:p.Ile850Lys		1	-1		-1	-1	Likely benign		-	-	-
NM_024675.4:c.2509G>A	NP_078951.2:p.Glu837Lys		-8	-1		-1	-10	Benign		criteria_provided,_conflicting_classifications	Conflicting_classifications_of_pathogenicity	Uncertain_significance(5)|Likely_benign(8)
NM_024675.4:c.2317A>G	NP_078951.2:p.Thr773Ala		1	-1		-1	-1	Likely benign		criteria_provided,_multiple_submitters,_no_conflicts	Uncertain_significance	-
NM_024675.4:c.2167A>T	NP_078951.2:p.Met723Leu		1	-1		-1	-1	Likely benign		criteria_provided,_conflicting_classifications	Conflicting_classifications_of_pathogenicity	Uncertain_significance(2)|Likely_benign(2)
NM_024675.4:c.833_834delinsAT	NP_078951.2:p.Leu278His		1	-1		-1	-1	Likely benign		criteria_provided,_conflicting_classifications	Conflicting_classifications_of_pathogenicity	Uncertain_significance(9)|Likely_benign(2)
NM_024675.4:c.25C>T	NP_078951.2:p.Leu9Phe		-4	-1		-1	-6	Likely benign		criteria_provided,_multiple_submitters,_no_conflicts	Uncertain_significance	-
NM_024675.4:c.11C>T	NP_078951.2:p.Pro4Leu		-4	-1		-1	-6	Likely benign		criteria_provided,_conflicting_classifications	Conflicting_classifications_of_pathogenicity	Uncertain_significance(7)|Likely_benign(4)
NM_024675.4:c.1379A>G	NP_078951.2:p.Gln460Arg		-8	-1		-1	-10	Benign		criteria_provided,_conflicting_classifications	Conflicting_classifications_of_pathogenicity	Uncertain_significance(8)|Benign(1)|Likely_benign(4)
NM_024675.4:c.229T>C	NP_078951.2:p.Cys77Arg			-1		-1	-2	Likely benign		criteria_provided,_multiple_submitters,_no_conflicts	Uncertain_significance	-
NM_024675.4:c.3307G>A	NP_078951.2:p.Val1103Met		-4	-1		-1	-6	Likely benign		criteria_provided,_conflicting_classifications	Conflicting_classifications_of_pathogenicity	Uncertain_significance(6)|Likely_benign(5)
NM_024675.4:c.2456A>G	NP_078951.2:p.Lys819Arg		1	-1		-1	-1	Likely benign		criteria_provided,_conflicting_classifications	Conflicting_classifications_of_pathogenicity	Uncertain_significance(7)|Likely_benign(2)
NM_024675.4:c.2417C>T	NP_078951.2:p.Pro806Leu			-1		-1	-2	Likely benign		criteria_provided,_conflicting_classifications	Conflicting_classifications_of_pathogenicity	Uncertain_significance(6)|Benign(1)|Likely_benign(2)
NM_024675.4:c.1337A>G	NP_078951.2:p.Asp446Gly		1	-1		-1	-1	Likely benign		criteria_provided,_multiple_submitters,_no_conflicts	Uncertain_significance	-
NM_024675.4:c.950C>T	NP_078951.2:p.Thr317Ile			-1		-1	-2	Likely benign		criteria_provided,_conflicting_classifications	Conflicting_classifications_of_pathogenicity	Uncertain_significance(5)|Benign(2)
NM_024675.4:c.194C>T	NP_078951.2:p.Pro65Leu			-1		-1	-2	Likely benign		criteria_provided,_conflicting_classifications	Conflicting_classifications_of_pathogenicity	Uncertain_significance(10)|Likely_benign(4)
NM_024675.4:c.110G>T	NP_078951.2:p.Arg37Leu		1	-1		-1	-1	Likely benign		criteria_provided,_multiple_submitters,_no_conflicts	Uncertain_significance	-
NM_024675.4:c.43G>A	NP_078951.2:p.Glu15Lys			-1		-1	-2	Likely benign		criteria_provided,_multiple_submitters,_no_conflicts	Uncertain_significance	-
NM_024675.4:c.3428T>A	NP_078951.2:p.Leu1143His		-8	-1		-1	-10	Benign		criteria_provided,_conflicting_classifications	Conflicting_classifications_of_pathogenicity	Uncertain_significance(12)|Benign(1)|Likely_benign(3)
NM_024675.4:c.2840T>C	NP_078951.2:p.Leu947Ser			-1		-1	-2	Likely benign		criteria_provided,_multiple_submitters,_no_conflicts	Uncertain_significance	-
NM_024675.4:c.2674G>A	NP_078951.2:p.Glu892Lys		-4	-1		-1	-6	Likely benign		criteria_provided,_conflicting_classifications	Conflicting_classifications_of_pathogenicity	Likely_pathogenic(1)|Uncertain_significance(11)|Benign(1)|Likely_benign(1)
NM_024675.4:c.2435C>T	NP_078951.2:p.Pro812Leu			-1		-1	-2	Likely benign		criteria_provided,_multiple_submitters,_no_conflicts	Uncertain_significance	-
NM_024675.4:c.2306T>C	NP_078951.2:p.Leu769Pro		1	-1		-1	-1	Likely benign		-	-	-
NM_024675.4:c.1127G>C	NP_078951.2:p.Ser376Thr		1	-1		-1	-1	Likely benign		criteria_provided,_multiple_submitters,_no_conflicts	Uncertain_significance	-
NM_024675.4:c.557A>T	NP_078951.2:p.Asn186Ile		1	-1		-1	-1	Likely benign		criteria_provided,_conflicting_classifications	Conflicting_classifications_of_pathogenicity	Uncertain_significance(8)|Likely_benign(1)
NM_024675.4:c.109C>T	NP_078951.2:p.Arg37Cys			-1		-1	-2	Likely benign		criteria_provided,_multiple_submitters,_no_conflicts	Uncertain_significance	-
NM_024675.4:c.829G>T	NP_078951.2:p.Asp277Tyr		1	-1		-1	-1	Likely benign		criteria_provided,_multiple_submitters,_no_conflicts	Uncertain_significance	-
NM_024675.4:c.355C>G	NP_078951.2:p.Gln119Glu		1	-1		-1	-1	Likely benign		-	-	-
*Please check ClinVar for the most up-to-date classification

## Sheet: PTEN
Supplementary Table 1d. Suggested clinically-relevant classifications from application of PTEN-specific ACMG/AMP criteria v3.0.0 and points system for variants with single or multiple conflicting submissions, Uncertain, or absent in ClinVar (as at 1 September 2022), with details on updated ClinVar classification (as at 27 January 2024)*
HGVSc	HGVSp	Population data (BA1, BS1, PM2)	Functional data (PS3, BS3)	In silico predictions (PP3, BP4)	BP7	Total points	Our suggested classification	Updated ClinVar review status (as at 27 Jan 2024)	Updated ClinVar classification (as at 27 Jan 2024)	Updated ClinVar conflicting submissions (as at 27 Jan 2024)
NM_000314.8:c.882T>G	NP_000305.3:p.Ser294Arg	-8	NA	-1	NA	-9	Benign	reviewed_by_expert_panel	Likely_benign	-
NM_000314.8:c.892C>G	NP_000305.3:p.Gln298Glu	-4	-1	-1	NA	-6	Benign	reviewed_by_expert_panel	Likely_benign	-
NM_000314.8:c.1026+60A>G	-	1	NA	-1	-1	-1	Likely benign	-	-	-
NM_000314.8:c.691C>A	NP_000305.3:p.Pro231Thr	1	-1	-1	NA	-1	Likely benign	criteria_provided,_single_submitter	Uncertain_significance	-
*Please check ClinVar for the most up-to-date classification

## Sheet: TP53
Supplementary Table 1e. Suggested clinically-relevant classifications from application of TP53-specific ACMG/AMP criteria v2.0.0 and points system for variants with single or multiple conflicting submissions, Uncertain, or absent in ClinVar (as at 1 September 2022), with details on updated ClinVar classification (as at 27 January 2024)*
HGVSc	HGVSp	Population data (BA1, BS1, PM2)	Functional data (PS3, BS3)	In silico predictions (PP3, BP4)	BP7	PM1	PS4	PP4	Total points	Our suggested classification	Updated ClinVar review status (as at 27 Jan 2024)	Updated ClinVar classification (as at 27 Jan 2024)	Updated ClinVar conflicting submissions (as at 27 Jan 2024)
NM_000546.6:c.665C>T	NP_000537.3:p.Pro222Leu	1	-4						-3	Likely benign	criteria_provided,_conflicting_classifications	Conflicting_classifications_of_pathogenicity	Uncertain_significance(8)|Benign(1)|Likely_benign(3)
NM_000546.6:c.787A>G	NP_000537.3:p.Asn263Asp	-4	-1	-2					-7	Benign	criteria_provided,_conflicting_classifications	Conflicting_classifications_of_pathogenicity	Uncertain_significance(3)|Likely_benign(6)
NM_000546.6:c.1016A>G	NP_000537.3:p.Glu339Gly	1	-4						-3	Likely benign	criteria_provided,_multiple_submitters,_no_conflicts	Uncertain_significance	-
NM_000546.6:c.833C>G	NP_000537.3:p.Pro278Arg	1	4	2		2			9	Likely pathogenic	criteria_provided,_conflicting_classifications	Conflicting_classifications_of_pathogenicity	Pathogenic(1)|Uncertain_significance(3)
NM_000546.6:c.511G>A	NP_000537.3:p.Glu171Lys	1	-4	1					-2	Likely benign	reviewed_by_expert_panel	Uncertain_significance	-
NM_000546.6:c.370T>C	NP_000537.3:p.Cys124Arg	1	4	2					7	Likely pathogenic	-	-	-
NM_000546.6:c.329G>T	NP_000537.3:p.Arg110Leu	1	4	1		2			8	Likely pathogenic	criteria_provided,_multiple_submitters,_no_conflicts	Pathogenic/Likely_pathogenic	-
NM_000546.6:c.684C>G	NP_000537.3:p.Asp228Glu	1	-4	-2					-5	Likely benign	criteria_provided,_conflicting_classifications	Conflicting_classifications_of_pathogenicity	Uncertain_significance(4)|Likely_benign(1)
NM_000546.6:c.638G>A	NP_000537.3:p.Arg213Gln	1	4	1		2	2		10	Pathogenic	criteria_provided,_multiple_submitters,_no_conflicts	Pathogenic	-
NM_000546.6:c.379T>A	NP_000537.3:p.Ser127Thr	1	4	1				1	7	Likely pathogenic	criteria_provided,_conflicting_classifications	Conflicting_classifications_of_pathogenicity	Pathogenic(1)|Uncertain_significance(3)
NM_000546.6:c.374C>T	NP_000537.3:p.Thr125Met	1		2		2	2		7	Likely pathogenic	criteria_provided,_conflicting_classifications	Conflicting_classifications_of_pathogenicity	Pathogenic(2)|Likely_pathogenic(8)|Uncertain_significance(1)
NM_000546.6:c.919+22C>T	-	1		-1	-1				-1	Likely benign	-	-	-
NM_000546.6:c.97-52G>A	-	1		-1	-1				-1	Likely benign	criteria_provided,_single_submitter	Uncertain_significance	-
NM_000546.6:c.822T>G	NP_000537.3:pVal274=	1		-1	-1				-1	Likely benign	criteria_provided,_multiple_submitters,_no_conflicts	Likely_benign	-
NM_000546.6:c.589G>A	NP_000537.3:p.Val197Met	1	2			1	1	1	6	Likely pathogenic	criteria_provided,_conflicting_classifications	Conflicting_classifications_of_pathogenicity	Likely_pathogenic(2)|Uncertain_significance(4)
*Please check ClinVar for the most up-to-date classification
